# Supplementary material for: Could screening participation bias symptom interpretation? An interview study on women's interpretations of and responses to cancer symptoms between mammography screening rounds
Source: PubMed Central journal article supplement — BMJ Open. 2012 Nov 12;2(6):e001508. doi: 10.1136/bmjopen-2012-001508 (PMC3532989; doi:10.1136/bmjopen-2012-001508), 2012-11-12
Supplement: bmjopen-2012-001508.draft_revisions.pdf [file bmjopen-2012-001508.draft_revisions.pdf]

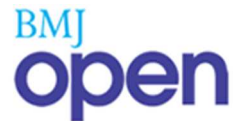

**Could screening participation bias symptom interpretation?  
An interview study of women's interpretations of and  
responses to cancer symptoms between mammography  
screening rounds.**

|                                 |                                                                                                                                                                                                                                                                                                                                                                                                                                                                                                                                                      |
|---------------------------------|------------------------------------------------------------------------------------------------------------------------------------------------------------------------------------------------------------------------------------------------------------------------------------------------------------------------------------------------------------------------------------------------------------------------------------------------------------------------------------------------------------------------------------------------------|
| Journal:                        | <i>BMJ Open</i>                                                                                                                                                                                                                                                                                                                                                                                                                                                                                                                                      |
| Manuscript ID:                  | bmjopen-2012-001508                                                                                                                                                                                                                                                                                                                                                                                                                                                                                                                                  |
| Article Type:                   | Research                                                                                                                                                                                                                                                                                                                                                                                                                                                                                                                                             |
| Date Submitted by the Author:   | 18-May-2012                                                                                                                                                                                                                                                                                                                                                                                                                                                                                                                                          |
| Complete List of Authors:       | Solbjør, Marit; Norwegian University of Science and Technology, Public Health and General Practice<br>Skolbekken, John-Arne; Norwegian University of Science and Technology, Department of Social Work and Health Sciences<br>Sætnan, Ann; Norwegian University of Science and Technology, Department of Sociology and Political Science<br>Hagen, Anne; Trondheim University Hospital, Department of Breast and Endocrine Surgery<br>Forsmo, Siri; Norwegian University of Science and Technology, Department of Public Health and General Practice |
| <b>Primary Subject Heading</b>: | Oncology                                                                                                                                                                                                                                                                                                                                                                                                                                                                                                                                             |
| Secondary Subject Heading:      | Health policy, Qualitative research, Sociology                                                                                                                                                                                                                                                                                                                                                                                                                                                                                                       |
| Keywords:                       | Screening, Breast cancer, Interval cancer, Qualitative study, mammography                                                                                                                                                                                                                                                                                                                                                                                                                                                                            |
|                                 |                                                                                                                                                                                                                                                                                                                                                                                                                                                                                                                                                      |

SCHOLARONE™  
Manuscripts

## Title page

**Title:** Could screening participation bias symptom interpretation? An interview study of women's interpretations of and responses to cancer symptoms between mammography screening rounds.

**Authors:**

Solbjør, Marit; Post.doc-fellow, Norwegian University of Science and Technology, Medical Faculty, Department of Public Health and General Practice, Postbox 8905, MTF5, 7491 Trondheim.

Skolbekken, John-Arne; Associate Professor, Norwegian University of Science and Technology, Department of Social Work and Health Sciences, 7491 Trondheim.

Sætnan, Ann Rudinow; Professor, Norwegian University of Science and Technology, Department of Sociology and Political Science, 7491 Trondheim.

Hagen, Anne Irene; Researcher/Senior Consultant, Department of Breast and Endocrine Surgery, Trondheim University Hospital, Trondheim, Norway

Forsmo, Siri; Professor, Norwegian University of Science and Technology, Medical Faculty, Department of Public Health and General Practice, Postbox 8905, MTF5, 7491 Trondheim.

**E-mail corresponding author:** [Marit.Solbjor@ntnu.no](mailto:Marit.Solbjor@ntnu.no)

Phone: +47 73598905, Fax: +47 73597577

**Authorship-contributorship statement:** MS, SF and JAS planned and designed the study. AIH contributed with recruitment together with MS. MS conducted the interviews. All authors contributed to the analysis of data and in writing the article. All authors agree on the submission of the present manuscript. MS is responsible for the overall content as guarantor.

**Ethics approval:** The study was approved by the Regional committee for medical research ethics (REK midt) and informed consent was given by all participants.

**Funding:** The study was financed by the Norwegian Research Council (NFR) through the research-based evaluation of the Norwegian Breast Cancer Screening Programme. NFR had no involvement in the research process or writing of this article.

**Acknowledgement:** The breast diagnostic units at Nordland Hospital and Trondheim University Hospital provided valuable help with recruitment.

1  
2  
3 Number of words: 2986

4  
5 Number of tables: 1

6  
7 Running head: Could screening participation bias symptom interpretation?  
8

9  
10 **Article summary:**

11  
12 **Article Focus**

- 13  
14  
15  
16  
17  
18  
19  
20  
21  
22  
23  
24
- Interval breast cancer comprises 28 per cent of cancers among screened women in Europe.
  - Women who participate in mammography screening may delay acting upon breast cancer symptoms if they trust screening results to be correct.
  - We asked women with interval breast cancer how they had reacted to detecting symptoms of breast cancer in-between screening rounds.

25  
26 **Key Messages**

- 27  
28  
29  
30  
31  
32  
33  
34  
35  
36  
37  
38  
39  
40  
41  
42
- Women who had participated in breast cancer screening interpreted lumps as symptoms of breast cancer and sought medical advice rapidly, despite having had a screening negative result. Some did, however, interpret themselves as delayers when seeking medical advice less than three months after symptom presentation.
  - Only few women who detected a symptom of breast cancer in-between screening rounds delayed seeking medical advice due to being participants in mammography screening.
  - It is essential that health care services take women's symptom interpretations seriously.

43  
44 **Strengths and limitations**

45  
46  
47  
48  
49  
50  
51  
52  
53  
54  
55  
56  
57  
58  
59  
60

This qualitative interview study is unique in studying the experiences of women with interval cancer and how they related their experiences with breast cancer to mammography screening. A limitation to the current study is that it is based on women's retrospective reports. Self-selection in responding to the invitation present a selection bias, women with advanced cancer might not have participated in the study, and participants could have been more resourceful than average.

**ABSTRACT**

**Objectives** To explore whether participation in mammography screening may have contributed to diagnostic delay among women with interval breast cancer.

**Design** Semi-structured individual interviews with women who have been diagnosed with breast cancer during mammography screening intervals.

**Setting** Two breast diagnostic units covering two counties in Norway.

**Participants** 26 women diagnosed with interval breast cancer.

**Results** Women with a screening negative result react in two ways when experiencing a possible symptom of breast cancer. Among 24 women with a self-detected palpable lesion, 14 sought medical advice immediately. Their argument was to dispose of potential cancer as soon as possible. Ten women delayed seeking medical advice. Practical reasons, uncertainty about having a symptom and previous experiences with illness or with medical personnel were reasons for delaying. Also, a recent negative mammography scan made some women assume that the palpable lesion was benign and wait for the next screening round.

**Conclusion** Participating in mammography screening could be a reason for a postponed reaction to a breast cancer symptom, though most women acted rapidly when detecting a palpable breast lesion. The participation in mammography screening does not necessarily increase awareness of breast cancer symptoms.

**Keywords:** Breast cancer, interval cancer, oncology, mammography, screening.

## **INTRODUCTION**

Mammography screening aims to provide a pre-symptomatic diagnosis of breast cancer. Nevertheless, interval cancer, which is cancer detected between screening rounds, comprise 28 per cent of cancers among screened women in Europe.<sup>1</sup> Survival rates for interval cancers have improved during recent decades,<sup>2</sup> but remain worse than for screening detected cancers.<sup>3;4</sup> Such rates may be due to the aggressive nature of interval cancers, but may potentially also be caused by diagnostic delay.

Diagnostic delay does occur at many stages of the cancer detection process.<sup>5</sup> We will here concentrate on the patients' interpretation of symptoms and help-seeking. Early detection of breast cancer has been promoted throughout the 20<sup>th</sup> century, including women's responsibility to react upon a palpable breast lesion.<sup>6-8</sup> Recognizing a symptom of breast cancer is not always a straightforward process. Cultural contexts influence symptom experiences and bodily signs become symptoms only after an interpretation that they are abnormal.<sup>5;9;10</sup> The process from onset of symptoms until recognition that the symptom may represent a pathological condition may be the period of time accounting for the greatest proportion of patient delay.<sup>11;12</sup> Interpreting symptoms as cancer do not automatically lead to taking action.<sup>10;13;14</sup>

Mode of detection is associated with diagnostic delay, favouring mammography over self-detection.<sup>15</sup> The positive effect of mammography must be balanced against wider issues about whether patient delay could be induced by the reassurance given following a false negative screening.<sup>16</sup> A previous qualitative study indicates that women trust mammography screening to provide true results about their breast status.<sup>17</sup> The question addressed in this article is whether screening participation interferes with the women's symptom interpretation and help seeking. This study aims at exploring how women with negative mammography screening results react when they observe breast symptoms that could indicate malignancy in-between screening rounds.

## **METHODS**

This was a qualitative interview study with women who had experienced interval breast cancer within the Norwegian breast cancer screening programme. This is a nationwide, public

1 screening programme that offers mammography biannually for all women aged 50-69. The  
2 study was approved by the Regional Committee for Medical Research.  
3  
4  
5

### 6 **Recruitment**

7 Forty women diagnosed with interval cancer at two hospitals in Central and Northern Norway  
8 received an information letter about the study from their hospital. They were the twenty last  
9 women diagnosed with interval breast cancer at each hospital, living in or nearby one of four  
10 cities (inhabitants 9.500-150.000), counting back from six months before the study invitation  
11 was sent. Totally, 26 women accepted the invitation by returning a form of consent to the  
12 research group.  
13  
14  
15  
16  
17

### 18 **The interviews**

19 Semi-structured interviews were carried out in 2009 by the first author (MS), at a hospital, a  
20 university, a hotel meeting room, or in the woman's home or workplace if requested. The  
21 women were invited to tell their breast cancer story, including how they detected the breast  
22 cancer symptoms. Each interview lasted 45 to 60 minutes, and was audiotaped prior to being  
23 transcribed in verbatim. All informants have been given fictitious names to secure anonymity.  
24  
25  
26  
27  
28  
29

### 30 **Analysis**

31 Two researchers read all the interviews independently, and all co-authors read some of the  
32 interviews. We used a method of constant comparison, comparing themes within and between  
33 interviews. All authors discussed themes arising from the interviews. We conducted thematic  
34 analysis.<sup>18</sup> Data were categorized using NVivo 8.0. Within each theme we found sub-themes  
35 which were subjected to meaning interpretation.<sup>19</sup>  
36  
37  
38  
39  
40  
41  
42  
43

## 44 **RESULTS**

### 45 **Participants**

46 The 26 participating women were aged 53 to 69 years, in average 59.4. Twenty-four women  
47 had discovered the symptoms of breast cancer themselves. Two were detected during other  
48 medical examinations. The women were diagnosed with breast cancer between three and 23  
49 months after their last screening mammography and were interviewed from six to 36 months  
50 after having their diagnosis. At the interview, all had been surgically treated, either with  
51 mastectomy or with breast conserving surgery, 21 women had gone through radiation therapy,  
52  
53  
54  
55  
56  
57  
58  
59  
60

1 and 14 had chemotherapy. Few women knew whether their malignant tumor represented a  
2 false negative mammography scan or a true interval cancer.  
3

4  
5  
6 Fourteen women contacted the health care services within a week after noticing a palpable  
7 lump (Table 1). Eight women waited between two weeks and three months before seeking  
8 medical advice, and two delayed more than three months. There were no differences in type  
9 of symptom between the immediate help-seekers and those waiting for weeks or months, as  
10 all talked about having a lump. At least two women retrospectively reported symptoms such  
11 as mastalgia or breast contour change, but as they had not related it to breast cancer before  
12 being diagnosed. In the following we will present the women's own explanations for their  
13 timing when seeking medical advice.  
14  
15  
16  
17  
18  
19

### 20 21 **Seeking medical advice immediately**

22 Those who saw themselves as having sought medical advice promptly had all called their  
23 doctor's office or the mammography clinic at the first opportunity or at least within a week of  
24 feeling a lump.  
25  
26

27 *"I detected it at eleven p.m. And there I was, with a glowing phone at eight a.m. (Laughter)*  
28 *Next morning, straight to the GP."* (Johanne, 56)  
29  
30  
31

32 The women who contacted their doctor immediately had no doubt about the possibility of  
33 having cancer. For them delay was no option after detecting a lump. In retrospect they had  
34 been certain that it could be a symptom of breast cancer. Thoughts about having cancer made  
35 acting upon it the rational option.  
36  
37  
38  
39

40 *"I was very quick to get to the GP. I was certain it was cancer right away. [...] I became very*  
41 *rational: Go to the clinic, make it go away."* (Vigdis, 62)  
42  
43  
44  
45

### 46 **Postponing seeking medical advice**

47 Ten of the women had waited between two weeks and six months before seeking medical  
48 advice. Some of the women reported that they reinterpreted embodied sensations as possible  
49 cancer symptoms in retrospect, after being diagnosed. Prior to feeling a lump, they had either  
50 not noticed these symptoms or at least not interpreted them as symptoms of cancer. The  
51 women offered multiple explanations for what they saw as delay; neither explanations nor the  
52 help-seeking steps they refer to are mutually exclusive.  
53  
54  
55  
56  
57  
58  
59  
60

### *Uncertainty about symptom*

All these women admitted that breast anomalies could often represent symptoms of breast cancer. However, their own bodily changes did not always stand out as definite symptoms. Being uncertain about the etiology of the breast change, it was initially interpreted as something imagined or something that could change back to normal.

*"No you can't date it because you just sense it and consider it, and eventually it grows, so it could maybe have been a month or so. [...] Yes, because it could potentially regress."*  
(Cecilie, 67)

Olaug (63) and Eva (57) explained their lesions due to sore skin from a tight bra or to an inflammation of some kind, sensations and observations the women later interpreted as possible early symptoms of cancer. These women delayed seeking medical advice as the symptoms appeared too vague, for instance having an unpleasant sensation in the breast, nausea or tiredness. They interpreted their bodily sensations into everyday experiences. In retrospect, different bodily experiences were re-interpreted as breast cancer symptoms.

### *Previous experiences*

Even once a bodily sensation was identified as a potential symptom there were many reasons to postpone seeking medical help. Previous negative experiences with health care services contributed to reluctance towards what might turn out to be an unnecessary medical examination. Those with multiple experiences with illness and disease were tired of being in the patient role. Prior negative encounters with health care services following diffuse symptoms gave a threshold for seeking help with diffuse breast cancer symptoms.

*"I thought it might be an inflammation because I have had arm inflammations before and maybe that could have spread. And it was sore too. And one isn't too happy to go running to the doctor either. I did that all the time when I was younger, before I was diagnosed with arthritis, and with all that pain, so I'd rather not go (laughter). I got so tired when they never could detect what was wrong with me and I got all kinds of medications which damaged... [...]. So I am glad when I feel healthy and don't have to go."*(Eva, 57)

Having had frequent visits to the GP made them uneasy about being seen as whimpering. This suggests that "being whimpering" or occupying health care services unnecessary were incoherent with their identity.



### *Practical reasons*

There were also practical reasons given for delaying seeking medical advice. Two women had already a scheduled appointment with their GP when they detected a lump. Both waited until the appointment before bringing the lump to the doctor's attention.

*"I had an appointment with the GP a few weeks after, so I waited until then. It was probably nothing anyway."* (Gudrun, 60)

Noticing a lump during holidays also led to a delay in seeing the doctor. Actions after finding a lump were not solely about the lesion, but also about their social situation. Practical reasons were intertwined with other explanations such as interpreting the mass as benign or non-existent.

### *Mammography screening*

For some of the women the essential argument for delaying was related to having participated in mammography screening. Two different time frames were important for this argument. One was about having had a negative mammography in the recent past. The other was about an upcoming mammography. Having recently had a mammography scan led some to interpret the newly discovered lump as harmless. Having trusted mammography to detect even non-palpable lumps, some of the women experienced as strange that cancer had not been found when attending screening. Petra, for instance, detected a lesion in April, but delayed acting upon it until October.

*"I wonder if it [last mammography screening] wasn't in January that year. And that was probably the reason for my interpretation. Because I thought that when they hadn't seen anything then, it could not be anything now."* (Petra, 66)

Being part of a screening programme made some women interpret bodily signs as not being breast cancer symptoms. One woman presented a forward-looking argument for delaying. She had started to wait for a screening invitation, but after several months with a growing tumour she called the screening unit asking for mammography.

*"I started to wait for the [mammography] bus that used to come, but it never came. Right? It was too long to wait, because I felt this... [...] Yes, because I'm usually called in. So I called*

1 *the hospital and asked them when the bus was due, and they said that it would not come until*  
2 *later that year, and she asked me if there was something specific I had on my mind? So I told*  
3 *her I had pain in a breast, but that I knew it isn't any danger when it hurts. "Go see a*  
4 *doctor", she said. So I called my GP that day, and got an appointment the next day.* (Inger,  
5 56)  
6  
7  
8  
9

10  
11 Even when interpreting her lump as potential cancer, Inger delayed acting on it as she waited  
12 for the screening programme to act. The two women who had waited six months before  
13 seeking medical advice both justified their delay with their status as screening participants.  
14  
15  
16

## 17 **DISCUSSION**

20 From this qualitative interview study we found that ten of 24 women who had been  
21 mammography screening participants put off seeking medical advice when detecting a  
22 palpable lump. Medically defined, diagnostic delay is waiting more than three months with a  
23 symptom before help-seeking. Though only two among 26 women with interval cancer were  
24 within this definition, the women who had not acted immediately considered themselves to  
25 have delayed the diagnosis. The four main reasons for waiting to seek medical advice for a  
26 breast cancer symptom were uncertainty about symptom interpretation, practical reasons,  
27 previous experiences, and being participants of mammography screening. To self-detect  
28 cancer, individuals must sense a symptom, acknowledge it as a symptom, and take action to  
29 seek medical advice.<sup>20</sup> It has hitherto not been known whether participating in mammography  
30 screening could influence any of these processes. What was unique in the present study was  
31 that all study participants had been participants in a mammography screening programme, and  
32 we explored whether screening participation could have contributed to a diagnostic delay.  
33  
34  
35  
36  
37  
38  
39  
40  
41  
42  
43

44 Symptom interpretation of breast cancer can cause patient delay.<sup>5;9-12;21;22</sup> Palpable lumps are  
45 a well-known symptom of breast cancer that should induce seeking medical advice. All  
46 women in a Dutch study associated lumps with breast cancer.<sup>5</sup> However, studies vary in their  
47 conclusions about whether having a palpable lesion is associated with more or less delay than  
48 non-palpable symptoms.<sup>13;23</sup> In the present study, all the women referred to lumps when  
49 asked what had led to seeking medical advice. Other symptoms had only been subject to  
50 interpretation in retrospect after the cancer diagnosis. For these women, participation in  
51 mammography screening might have increased awareness about self-examination for lumps  
52 but had apparently not increased knowledge of other symptoms.  
53  
54  
55  
56  
57  
58  
59  
60

1  
2  
3 Delay in seeking medical advice cannot be explained solely by lack of knowledge.<sup>24</sup> All the  
4 women knew that a lump could be a sign of cancer, and yet some delayed seeking medical  
5 advice. Patient delay can depend on the patient's interpretation of bodily signs as related to  
6 cancer.<sup>20</sup> Although they knew in general that a lump could be a sign of cancer, some of the  
7 women did not immediately make that connection in their own case. As found in earlier  
8 studies, they did not expect to be ill and their current situation provided alternative  
9 explanations for their bodily experiences.<sup>9</sup> The present study indicates that participating in  
10 mammography screening may provide other explanations for bodily signs, since cancer had  
11 not been detected by mammography. Retrospective interpretations of bodily sensations as  
12 symptoms of breast cancer suggest that some had been reluctant to trust their own bodily  
13 sensations. In this sense mammography may contribute to medicalisation, leaving women to  
14 trust medical technology over their own bodily sensations. Another interpretation is that they  
15 were too frightened by the prospect of having cancer to react to potential symptoms, in which  
16 case screening programme participation was not so much a contributing factor to delay as it  
17 was an available excuse to avoid contemplating cancer.  
18  
19  
20  
21  
22  
23  
24  
25  
26  
27  
28

29  
30 The two arguments about mammography screening as reason for delaying seeking medical  
31 advice about potential breast cancer did suggest that having a public screening programme  
32 may lead to too much trust. Though only few women expressed such arguments, our study has  
33 revealed their existence in the population. Trusting previous screens to be correct may have  
34 led to non-cancer interpretations of symptoms. Waiting for the next screening round instead  
35 of acting upon a palpable lump indicate high trust in the correctness of a biannual design. The  
36 regularity of screening programmes offers to take responsibility for detecting cancer.  
37  
38  
39  
40  
41  
42

43 Delay has been an essential concept throughout breast cancer history in the US.<sup>8</sup> Cultural  
44 studies of breast cancer have been scarce in Norway, but media campaigns against delayed  
45 diagnosis have been implemented. These women's delayed actions must be understood within  
46 such a broader cultural context. Dominating the last decennials are discourses seeing breast  
47 cancer as a continuum, with one consequence being that women's breasts must be under  
48 constant surveillance both by themselves and by others.<sup>7</sup> As a consequence, surveillance  
49 becomes the sole option for responsible health behaviour. Though ten women in the present  
50 study claimed having delayed, only two women delayed more than three months. Those who  
51 saw themselves as having delaying had varied and complex arguments explaining their  
52 (in)actions while women who sought medical help immediately were certain they were doing  
53  
54  
55  
56  
57  
58  
59  
60

1 the right thing. Initiating mammography screening programmes may have increased the  
2 understanding of the importance of early detection, leaving individual women with  
3 responsibility for pursuing early detection between screening rounds.  
4  
5  
6

### 7 **Strengths and limitations**

8 This qualitative interview study is unique in studying the experiences of women with interval  
9 cancer and how they related their experiences with breast cancer to mammography screening.  
10 Being interviewed about delaying seeking medical advice when detecting symptoms that later  
11 were diagnosed as cancer could be discomfoting for those feeling guilty about delaying,  
12 leading to answers masking guilt. A limitation to the current study is that it is based on  
13 women's retrospective reports. Some had been diagnosed up to 3 years prior to the interview.  
14 "Pre-cancerous" experiences may not be the most important to remember after going through  
15 intensive cancer treatment, and could have been reinterpreted several times since experiencing  
16 them.  
17  
18  
19  
20  
21  
22  
23

24 Nearly 65 per cent of those invited to the study chose to participate. All women with interval  
25 cancer within a specific period in these communities were invited, but self-selection in  
26 responding to the invitation present a selection bias. Women with advanced cancer might not  
27 have participated in the study. Despite their age and cancer diagnosis, only six of these  
28 women were fully retired, which indicates that participants could have been more resourceful  
29 than average. Due to long distances and the low population density in rural Norway, all  
30 invited to the study lived in or near urban or semi-urban areas.  
31  
32  
33  
34  
35  
36  
37  
38

39 We could expect cancer symptoms to be common in the population, with approximately 15  
40 per cent of the population at any time having experienced cancer symptoms.<sup>25</sup> Women with  
41 symptoms in-between screening rounds could be classified in three groups: women who had  
42 an interval cancer diagnosis, women who found a benign lump, and women who delayed  
43 seeking medical advice until their next screening round. Only the first group were subject to  
44 this study, and more research on symptom interpretation among screening participants is  
45 warranted.  
46  
47  
48  
49  
50  
51  
52

### 53 **Implications**

54 Confidence in mammography programmes influences the interpretation of breast cancer  
55 symptoms. Awareness of symptoms other than lumps must be improved. Though information  
56 leaflets provide information about interval breast cancer, women might not read leaflets  
57  
58  
59  
60

1 thoroughly. Additional verbal information during examinations could be one solution.  
2  
3 Previous experiences of vague symptoms being set aside could lead women to neglect their  
4 own bodily sensations and prefer technology to give answers to their health status. Health  
5 professionals must take care not to define women as hypochondriacs when presenting vague  
6 symptoms but advise all individuals to present potential symptoms of cancer immediately.  
7  
8  
9  
10  
11  
12  
13  
14  
15  
16

## 17 REFERENCE LIST

- 18 1 Tornberg S, Kemetli L, Ascunce N, Hofvind S, Anttila A, Seradour B et al. A pooled  
19 analysis of interval cancer rates in six European countries. *Eur J of Cancer Prev* 2010;  
20 **19**(2):87-93.  
21
- 22 2 Zackrisson S, Janzon L, Manjer J, et al. Improved survival rate for women with interval  
23 breast cancer - results from the breast cancer screening programme in Malmo, Sweden  
24 1976-1999. *J Med Screen* 2007; **14**(3):138-143.  
25
- 26 3 Vitak B, Olsen KE, Manson JC, et al. Tumour characteristics and survival in patients  
27 with invasive interval breast cancer classified according to mammographic findings at  
28 the latest screening: a comparison of true interval and missed interval cancers. *Eur*  
29 *Radiol* 1999; **9**(3):460-469.  
30
- 31 4 Shen Y, Yang Y, Inoue LY, et al. Role of detection method in predicting breast cancer  
32 survival: analysis of randomized screening trials. *J Natl Cancer Inst* 2005; **97**(16):1195-  
33 1203.  
34
- 35 5 De Nooijer J, Lechner L, De Vries H. A qualitative study on detecting cancer symptoms  
36 and seeking medical help; an application of Andersen's model of total patient delay. *Pat*  
37 *Edu Couns* 2001; **42**(2):145-157.  
38
- 39 6 Lerner BH. The breast cancer wars. Hope, fear, and the pursuit of a cure in twentieth-  
40 century America. Oxford: Oxford University Press; 2001.  
41
- 42 7 Klawiter M. The biopolitics of breast cancer. Changing cultures of disease and activism.  
43 Minneapolis: University of Minnesota Press; 2008.  
44
- 45 8 Aronowitz RA. Do not delay: Breast cancer and time, 1900-1970. *Milbank Quarterly*  
46 2001; **79**(3):355-386.  
47
- 48 9 Andersen RS, Paarup B, Vedsted P, et al 'Containment' as an analytical framework for  
49 understanding patient delay: a qualitative study of cancer patients' symptom  
50 interpretation processes. *Soc Sci Med* 2010; **71**(2):378-385.  
51
- 52 10 Sun Y, Knobf T. Concept Analysis of Symptom Disclosure in the Context of Cancer.  
53 *Adv Nurs Sci* 2008; **31**(4):332-341.  
54  
55  
56  
57  
58  
59  
60

- 11 Andersen BL, Cacioppo JT. Delay in seeking a cancer diagnosis: delay stages and psychophysiological comparison processes. *Br J Soc Psychol* 1995; **34** ( Pt 1):33-52.
- 12 Ristvedt SL, Trinkaus KM. Psychological factors related to delay in consultation for cancer symptoms. *Psychooncology* 2005; **14**(5):339-350.
- 13 Facione NC, Facione PA. The cognitive structuring of patient delay in breast cancer. *Soc Sci Med* 2006; **63**(12):3137-3149.
- 14 De Nooijer J, Lechner L, De Vries H. Social psychological correlates of paying attention to cancer symptoms and seeking medical help. *Soc Sci Med* 2003; **56**(5):915-920.
- 15 Crispo A, Montella M, Barba M, et al. Association between mode of breast cancer detection and diagnosis delay. *Breast* 2009; **18**(6):382-386.
- 16 de Gelder R., van As E., Tilanus-Linthorst MM, et al Breast cancer screening: evidence for false reassurance? *Int J Cancer* 2008; **123**(3):680-686.
- 17 Solbjør M. "You Have to Have Trust in Those Pictures." A Perspective on Women's Experiences of Mammography Screening. In: Brownlie J, Greene A, Howson A, editors. *Researching Trust and Health*. London: Routledge; 2008.
- 18 Coffey A, Atkinson P. Making sense of qualitative data. Complementary research strategies. Thousand Oaks: Sage Publications; 1996.
- 19 Kvale S, Brinkmann S. Interviews. An introduction to qualitative research interviewing. 2 ed. London: Sage; 2008.
- 20 Andersen RS, Vedsted P, Olesen F, et al Patient delay in cancer studies: a discussion of methods and measures. *BMC Health Serv Res* 2009; **9**:189.
- 21 Simon AE, Waller J, Robb K, et al Patient delay in presentation of possible cancer symptoms: the contribution of knowledge and attitudes in a population sample from the United kingdom. *Cancer Epi Bio Prev* 2010; **19**(9):2272-2277.
- 22 Rauscher GH, Ferrans CE, Kaiser K, et al Misconceptions about breast lumps and delayed medical presentation in urban breast cancer patients. *Cancer Epi Bio Prev* 2010; **19**(3):640-647.
- 23 Macleod U, Mitchell ED, Burgess C, et al Risk factors for delayed presentation and referral of symptomatic cancer: evidence for common cancers. *Br J Cancer* 2009; **101** Suppl 2:S92-S101.
- 24 De Nooijer J, Lechner L, De Vries H. Help-seeking behaviour for cancer symptoms: Perceptions of patients and general practitioners. *PsychoOncology* 2001; **10**(6):469-478.
- 25 Svendsen RP, Stovring H, Hansen BL, et al Prevalence of cancer alarm symptoms: a population-based cross-sectional study. *Scand J Prim Health Care* 2010; **28**(3):132-137.

Table 1 Description of women who participated in study

| Reaction time | Detected though other medical examinations | 1-2 days           | Within 2 weeks    | Less than 2 months | Approx 6 months  |                   |
|---------------|--------------------------------------------|--------------------|-------------------|--------------------|------------------|-------------------|
| Age           |                                            |                    |                   |                    |                  | Mean=59.4         |
| 50-54         | 0                                          | 2                  | 0                 | 1                  | 0                | 3 (11,5 %)        |
| 55-59         | 1                                          | 5                  | 3                 | 1                  | 1                | 11 (42,3 %)       |
| 60-64         | 0                                          | 3                  | 3                 | 2                  | 0                | 8 (30,8 %)        |
| 65-69         | 1                                          | 1                  | 0                 | 1                  | 1                | 4 (15,4 %)        |
| <b>Sum</b>    | <b>2 (7,7 %)</b>                           | <b>11 (42,3 %)</b> | <b>6 (23,0 %)</b> | <b>5 (19,2 %)</b>  | <b>2 (7,7 %)</b> | <b>Total N=26</b> |



**Could screening participation bias symptom interpretation?  
An interview study on women's interpretations of and  
responses to cancer symptoms between mammography  
screening rounds.**

|                                 |                                                                                                                                                                                                                                                                                                                                                                                                                                                                                                                                                      |
|---------------------------------|------------------------------------------------------------------------------------------------------------------------------------------------------------------------------------------------------------------------------------------------------------------------------------------------------------------------------------------------------------------------------------------------------------------------------------------------------------------------------------------------------------------------------------------------------|
| Journal:                        | <i>BMJ Open</i>                                                                                                                                                                                                                                                                                                                                                                                                                                                                                                                                      |
| Manuscript ID:                  | bmjopen-2012-001508.R1                                                                                                                                                                                                                                                                                                                                                                                                                                                                                                                               |
| Article Type:                   | Research                                                                                                                                                                                                                                                                                                                                                                                                                                                                                                                                             |
| Date Submitted by the Author:   | 30-Aug-2012                                                                                                                                                                                                                                                                                                                                                                                                                                                                                                                                          |
| Complete List of Authors:       | Solbjør, Marit; Norwegian University of Science and Technology, Public Health and General Practice<br>Skolbekken, John-Arne; Norwegian University of Science and Technology, Department of Social Work and Health Sciences<br>Sætnan, Ann; Norwegian University of Science and Technology, Department of Sociology and Political Science<br>Hagen, Anne; Trondheim University Hospital, Department of Breast and Endocrine Surgery<br>Forsmo, Siri; Norwegian University of Science and Technology, Department of Public Health and General Practice |
| <b>Primary Subject Heading</b>: | Oncology                                                                                                                                                                                                                                                                                                                                                                                                                                                                                                                                             |
| Secondary Subject Heading:      | Health policy, Qualitative research, Sociology                                                                                                                                                                                                                                                                                                                                                                                                                                                                                                       |
| Keywords:                       | Screening, Breast cancer, Interval cancer, Qualitative study, mammography                                                                                                                                                                                                                                                                                                                                                                                                                                                                            |
|                                 |                                                                                                                                                                                                                                                                                                                                                                                                                                                                                                                                                      |

SCHOLARONE™  
Manuscripts



## Title page

Title: Could screening participation bias symptom interpretation? An interview study on women's interpretations of and responses to cancer symptoms between mammography screening rounds.

### Authors:

Solbjør, Marit; Post.doc-fellow, Norwegian University of Science and Technology, Medical Faculty, Department of Public Health and General Practice, Postbox 8905, MTFS, 7491 Trondheim.

Skolbekken, John-Arne; Associate Professor, Norwegian University of Science and Technology, Department of Social Work and Health Science, 7491 Trondheim.

Sætnan, Ann Rudinow; Professor, Norwegian University of Science and Technology, Department of Sociology and Political Science, 7491 Trondheim.

Hagen, Anne Irene; Researcher/Senior Consultant, Department of Breast and Endocrine Surgery, Trondheim University Hospital, Trondheim, Norway

Forsmo, Siri; Professor, Norwegian University of Science and Technology, Medical Faculty, Department of Public Health and General Practice, Postbox 8905, MTFS, 7491 Trondheim.

E-mail corresponding author: [Marit.Solbjor@ntnu.no](mailto:Marit.Solbjor@ntnu.no)

Phone: +47 73598905, Fax: +47 73597577

Authorship-contributorship statement: MS, SF and JAS planned and designed the study. AIH contributed with recruitment together with MS. MS conducted the interviews. All authors contributed to the analysis of data and in writing the article. All authors agree on the submission of the present manuscript. MS is responsible for the overall content as guarantor.

Ethics approval: The study was approved by the Regional committee for medical research ethics (REK midt) and informed consent was given by all participants.

Funding: The study was financed by the Norwegian Research Council (NFR) through the research-based evaluation of the Norwegian Breast Cancer Screening Programme. NFR had no involvement in the research process or writing of this article.

1  
2  
3 Acknowledgement: The breast diagnostic units at Nordland Hospital and Trondheim University  
4 Hospital provided valuable help with recruitment.  
5  
6  
7

8  
9 Number of words: 3332

10  
11 Number of tables: 2

12  
13 Running head: Could screening participation bias symptom interpretation?  
14  
15

## 16 17 **Article summary:**

### 18 19 Article Focus

- 20  
21 • Interval breast cancer comprises 28 per cent of cancers among screened women in Europe.
- 22  
23 • Women who participate in mammography screening may delay acting upon breast cancer  
24 symptoms if they trust screening results to be correct.
- 25  
26 • We asked women with interval breast cancer how they had reacted to detecting symptoms  
27 of breast cancer in-between screening rounds.  
28  
29  
30  
31  
32

### 33 34 Key Messages

- 35  
36 • Despite the last mammography screening being negative, most of the interviewed women  
37 interpreted lumps as breast cancer symptoms and sought medical advice rapidly. Some  
38 women defined themselves as delayers despite seeking medical advice less than three  
39 months after symptom presentation.
- 40  
41 • Only a few women who detected symptoms of breast cancer in-between screening rounds  
42 delayed seeking medical advice due to a recent negative screening result in the  
43 mammography screening programme.
- 44  
45 • Other symptoms than lumps were only acknowledged as cancer symptoms in retrospect.  
46 Screening seems a missed opportunity to inform women better about breast cancer  
47 symptoms.  
48  
49  
50  
51  
52  
53  
54

### 55 56 Strengths and limitations

57  
58  
59  
60

1  
2  
3 This qualitative interview study is unique in studying the experiences of women with interval cancer  
4 and how they related their experiences with breast cancer to mammography screening. A limitation  
5 to the current study is that it is based on women's retrospective reports. Self-selection in responding  
6 to the invitation present a selection bias; women with advanced cancer might not have participated  
7 in the study, and participants may have been more resourceful than average.  
8  
9  
10  
11  
12  
13  
14  
15  
16  
17  
18  
19  
20  
21  
22  
23  
24  
25  
26  
27  
28  
29  
30  
31  
32  
33  
34  
35  
36  
37  
38  
39  
40  
41  
42  
43  
44  
45  
46  
47  
48  
49  
50  
51  
52  
53  
54  
55  
56  
57  
58  
59  
60

For peer review only

## **ABSTRACT**

Objectives To explore how women with negative mammography screening results, but who were later diagnosed with interval breast cancer, reacted when they observed breast symptoms that could indicate malignancy in-between screening rounds.

Design Semi-structured individual interviews with women who have been diagnosed with breast cancer during mammography screening intervals.

Setting Two breast diagnostic units covering two counties in Norway.

Participants 26 women diagnosed with interval breast cancer.

Results Women with a screening negative result react in two ways when experiencing a possible symptom of breast cancer. Among 24 women with a self-detected palpable lesion, 14 sought medical advice immediately. Their argument was to dispose of potential cancer as soon as possible. Ten women delayed seeking medical advice, explaining their delay as a result of practical difficulties such as holidays, uncertainty about the symptom, and previous experiences of health care services' ability to handle diffuse symptoms. Also, a recent negative mammography scan led some women to assume that the palpable lesion was benign and wait for the next screening round.

Conclusion Participating in mammography screening may contribute to a postponed reaction to breast cancer symptoms, although most women acted rapidly when detecting a palpable breast lesion. Furthermore, screening participation does not necessarily increase awareness of breast cancer symptoms.

Keywords: Breast cancer, interval cancer, oncology, mammography, screening.

## INTRODUCTION

Mammography screening aims to provide a pre-symptomatic diagnosis of breast cancer. Nevertheless, interval cancer, which is cancer detected between screening rounds, comprises 28 per cent of cancers among screened women in Europe.<sup>1</sup> Survival rates for interval cancers have improved during recent decades<sup>2</sup>, and it is controversial whether true interval cancers have less favourable prognosis than screening detected cancers or breast cancers diagnosed outside a screening programme.<sup>3-5</sup> Rayson et al found poorer survival in true interval breast cancer compared to screen-detected cancers. The findings of adverse prognostic factors like higher grade and stage, receptor negativity and high mitotic index in true interval cancers might contribute to poorer survival outcome<sup>6,7</sup>. Diagnostic delay may also be a factor.

Diagnostic delay occurs at many stages of the cancer detection process.<sup>8</sup> We will here concentrate on screening participants interpretation of bodily changes, and their help-seeking. Early detection of breast cancer has been promoted throughout the 20<sup>th</sup> century, including women's responsibility to react upon a palpable breast lesion.<sup>9-11</sup> Nevertheless, recognition of a breast cancer symptom is not always a straightforward process. Cultural contexts influence symptom experiences and bodily signs become symptoms only after an interpretation that they are abnormal.<sup>8,12,13</sup> The process from the onset of bodily changes until recognition of a symptom may be the period of time accounting for the greatest proportion of patient delay.<sup>14,15</sup> But even then, interpreting symptoms as cancer does not automatically lead to taking action.<sup>13,16,17</sup>

An argument for mammography screening is that it leads to earlier breast cancer detection compared with women's self-detection. The positive effect mammography may have on the time of detection must, however, be balanced against whether patient delay could be induced by the reassurance given following a negative screening.<sup>18</sup> A previous qualitative study indicates that women trust mammography screening to provide true results about their breast status.<sup>19</sup> The question addressed in this article is whether screening participation interferes with the women's symptom interpretation and help seeking. This study explores how women with negative mammography screening results who were later diagnosed with interval breast cancer, reacted when they observed breast symptoms that could indicate malignancy in-between screening rounds.

## METHODS

This was a qualitative interview study with women who had experienced interval breast cancer within the Norwegian breast cancer screening programme. This is a nationwide, public screening

1  
2  
3 programme that offers mammography biennially for all women aged 50-69. The study was approved  
4 by the Regional Committee for Medical Research; participation was based on written consent.  
5

#### 6 Recruitment

7  
8 Forty women diagnosed with interval cancer at two hospitals in Central and Northern Norway were  
9 invited to the study. During the years 2006-2009, 178 interval breast cancers were diagnosed at  
10 these two hospitals. Due to long distances and the low population density in rural Norway, all invited  
11 to the study lived in or near urban or semi-urban areas. In order to have the women's stories as close  
12 to the event as possible, they were the twenty women last diagnosed with interval breast cancer at  
13 each hospital, living in or nearby one of four cities (inhabitants 9,500-150,000), counting back from  
14 six months before the study invitation was sent. A total of 26 women accepted the invitation. Due to  
15 confidentiality regulations, we have no access to information about the 14 women who did not  
16 respond to the invitation.  
17  
18  
19  
20  
21  
22  
23

#### 24 The interviews

25  
26 Semi-structured interviews were carried out in 2009 by the first author (MS), at a hospital, a  
27 university, a hotel meeting room, or in the woman's home or workplace if requested. Following a  
28 semi-structured interview guide, the women were invited to tell their breast cancer story, including  
29 what kind of breast cancer symptoms they had reacted to. Other questions were about their views  
30 on mammography screening and reactions upon having interval breast cancer. Each interview lasted  
31 45 to 60 minutes, and was audiotaped prior to being transcribed in verbatim. All informants have  
32 been given fictitious names to secure anonymity.  
33  
34  
35  
36  
37  
38  
39

#### 40 Analysis

41  
42 Two researchers read all the interviews independently, and all co-authors read some of the  
43 interviews. We used a method of constant comparison, comparing themes within and between  
44 interviews. All authors discussed themes arising from the interviews. We conducted thematic  
45 analysis.<sup>20</sup> Data were categorized using NVivo 8.0. Within each theme we found sub-themes which  
46 were subjected to meaning interpretation.<sup>21</sup>  
47  
48  
49  
50  
51  
52

## 53 RESULTS

### 54 Participants

55  
56  
57  
58  
59  
60

1  
2  
3 The 26 participating women were aged 53 to 69 years, in average 59.4. Twenty-four had discovered  
4 the symptoms of breast cancer themselves; two were detected during other medical examinations.  
5  
6 The women were diagnosed with breast cancer between three and 23 months after their last  
7 screening mammography and were interviewed from six to 36 months after diagnosis. Based on the  
8 women's reports during the interview, all had been surgically treated, either with mastectomy or  
9 with breast conserving surgery, 21 women had undergone radiation therapy, and 14 chemotherapy  
10 (Table 1). Few women knew whether their malignant tumor represented a false negative  
11 mammography scan or a true interval cancer. Some had asked for a review of previous images, but  
12 most did not mention the possibility of false negative screening when asked about their thoughts on  
13 having breast cancer between screening rounds.  
14  
15  
16  
17  
18  
19

20  
21  
22 Fourteen had contacted the health care services within a week after noticing a palpable lump (Table  
23 2). Eight had waited between two weeks and three months before seeking medical advice, and two  
24 delayed more than three months. There were no differences in type of symptom between the  
25 immediate help-seekers and those waiting for weeks or months, as all talked about having a lump.  
26  
27 Two women retrospectively reported symptoms such as mastalgia or breast contour change, but  
28 they had not related this to breast cancer before being diagnosed. In the following we will present  
29 the women's own explanations for their timing when seeking medical advice.  
30  
31  
32  
33  
34  
35

### 36 **Seeking medical advice immediately**

37  
38 Those who saw themselves as having sought medical advice promptly had all called their doctor's  
39 office or the mammography clinic at the first opportunity or at least within a week of feeling a lump.

40  
41 *"I detected it at eleven p.m. And there I was, with a glowing phone at eight a.m. (Laughter) Next*  
42 *morning, straight to the GP."* (Johanne, 56)  
43  
44

45  
46 The women who contacted their doctor immediately had no doubt about the possibility of having  
47 cancer. For them delay was no option after detecting a lump. In retrospect they had been certain  
48 that it could be a symptom of breast cancer. Thoughts about having cancer made acting upon it the  
49 rational option.  
50  
51

52  
53 *"I was very quick to get to the GP. I was certain it was cancer right away. [...] I became very rational:*  
54 *Go to the clinic, make it go away."* (Vigdis, 62)  
55  
56  
57

### 58 **Postponing seeking medical advice**

59  
60

1  
2  
3 Ten of the women had waited between two weeks and six months before seeking medical advice.  
4 Some of the women reported that they reinterpreted embodied sensations as possible cancer  
5 symptoms in retrospect, after being diagnosed. Prior to feeling a lump, they had either not noticed  
6 these symptoms or at least not interpreted them as symptoms of cancer. Each woman gave several  
7 explanations for what she retrospectively saw as her delay in help-seeking.  
8  
9  
10

### 11 12 13 **Uncertainty about symptom**

14  
15 All these women acknowledged that breast anomalies could often represent symptoms of breast  
16 cancer. However, their own bodily changes did not always stand out as definite symptoms. Being  
17 uncertain about the etiology of the breast change, it was initially interpreted as imaginary or  
18 something that could change back to normal.  
19  
20  
21

22  
23 *"No you can't date it because you just sense it and consider it, and eventually it grows, so*  
24 *it could maybe have been a month or so. [...] Yes, because it could potentially regress."*  
25  
26 *(Cecilie, 67)*  
27

28 Olaug (63) and Eva (57) explained their lesions due to sore skin from a tight bra or to an inflammation  
29 of some kind, sensations and observations the women later reinterpreted as possible early  
30 symptoms of cancer. They delayed seeking medical advice as the symptoms appeared too vague, for  
31 instance having an unpleasant sensation in the breast, nausea or tiredness. Their initial  
32 interpretations of their bodily sensations were framed by everyday experiences, as mentioned  
33 above. In hindsight, these bodily experiences were acknowledged as breast cancer symptoms.  
34  
35  
36  
37  
38  
39

### 40 41 **Previous experiences**

42 Postponement of help seeking also occurred after a bodily sensation was identified as a potential  
43 symptom. Previous negative experiences with health care services contributed to reluctance towards  
44 seeking potentially unnecessary medical examinations. Those with multiple experiences with illness  
45 and disease were tired of being in the patient role. Prior negative encounters with health care  
46 services following diffuse symptoms resulted in a threshold against seeking help with diffuse breast  
47 cancer symptoms.  
48  
49  
50  
51

52  
53 *"I thought it might be an inflammation because I have had joint inflammations before and*  
54 *maybe that could have spread. And it was sore too. And one isn't too happy to go running*  
55 *to the doctor either. I did that all the time when I was younger, before I was diagnosed*  
56 *with arthritis, and with all that pain, so I'd rather not go (laughter). I got so tired when*  
57  
58  
59  
60



1  
2  
3 *they never could detect what was wrong with me and I got all kinds of medications which*  
4 *damaged... [...] So I am glad when I feel healthy and don't have to go."*(Eva, 57)  
5  
6

7 Having had frequent visits to the GP made some uneasy about being seen as whimpering. This  
8 suggests that "be a whimperer" or seeking health care services unnecessary were incoherent with  
9 their identity. Rather than be perceived as hypochondriacs, they would delay help-seeking for  
10 uncertain symptoms.  
11  
12

### 13 **Practical reasons**

14  
15  
16  
17  
18 There were also practical reasons given for delaying seeking medical advice. Two women had already  
19 a scheduled appointment with their GP when they detected a lump. Both waited until the  
20 appointment before bringing the lump to the doctor's attention.  
21  
22

23  
24  
25 *"I had an appointment with the GP a few weeks after, so I waited until then. It was*  
26 *probably nothing anyway."*(Gudrun, 60)  
27  
28

29  
30  
31 Noticing a lump during holidays also led to a delay in seeing the doctor. Actions after finding a lump  
32 were not solely about the lesion, but also about their social situation. Practical reasons were  
33 intertwined with other explanations such as interpreting the mass as benign or non-existent.  
34  
35

### 36 **Mammography screening**

37  
38  
39  
40 For some of the women the essential argument for delaying was related to having participated in  
41 mammography screening. Two different time frames were important for this argument. One was  
42 about having had a negative mammography in the recent past. The other was about an upcoming  
43 mammography. Having recently had a mammography scan led some to interpret the newly  
44 discovered lump as harmless. Having trusted mammography to detect even non-palpable lumps,  
45 some of the women experienced it as strange that cancer had not been found at the screening.  
46  
47  
48  
49 Petra, for instance, detected a lesion in April, but delayed acting upon it until October.  
50  
51

52  
53  
54 *"I wonder if it [last mammography screening] wasn't in January that year. And that was*  
55 *probably the reason for my interpretation. Because I thought that when they hadn't seen*  
56 *anything then, it could not be anything now."* (Petra, 66)  
57  
58  
59  
60

1  
2  
3  
4  
5 Being part of a screening programme thus contributed to some women's interpretation of bodily  
6 signs as not being breast cancer symptoms. One woman presented a forward-looking argument for  
7 delaying. She had started to wait for a screening invitation, but after several months with a growing  
8 tumour she called the screening unit asking for the next screening appointment.  
9  
10

11  
12  
13  
14 *"I started to wait for the [mammography] bus that used to come, but it never came. Right?*  
15 *It was too long to wait, because I felt this... [...] Yes, because I'm usually called in. So I*  
16 *called the hospital and asked them when the bus was due, and they said that it would not*  
17 *come until later that year, and she asked me if there was something specific I had on my*  
18 *mind? So I told her I had pain in a breast, but that I knew it isn't any danger when it hurts.*  
19 *"Go see a doctor", she said. So I called my GP that day, and got an appointment the next*  
20 *day." (Inger, 56)*  
21  
22  
23  
24  
25  
26  
27

28 Even when interpreting her lump as potential cancer, Inger delayed acting on it as she waited for the  
29 screening programme to act. Both women who had waited six months before seeking medical advice  
30 explained their delay with their screening participation. This suggests that some participants place  
31 too much trust in the cancer detection capabilities of the screening programme.  
32  
33  
34  
35  
36  
37

## 38 **DISCUSSION**

39  
40 From this qualitative interview study we found that ten of 24 women who had been mammography  
41 screening participants put off seeking medical advice when detecting a palpable lump. True interval  
42 breast cancer could have poorer survival compared to screen-detected cancers.<sup>6</sup> Delaying acting on a  
43 breast cancer symptom between screening rounds could potentially decrease survival. Medically  
44 defined, diagnostic delay is waiting more than three months with a symptom before help-seeking.  
45 Though only two among these 26 women fell within this definition, eight further women who had  
46 not acted immediately considered themselves to have delayed the diagnosis. The four main reasons  
47 for waiting to seek medical advice were uncertainty about symptom interpretation, practical reasons,  
48 previous negative experiences, and being participants of mammography screening. In order to self-  
49 detect cancer, individuals must sense a symptom, acknowledge it as such, and take action to seek  
50 medical advice.<sup>22</sup> It has hitherto not been known whether participating in mammography screening  
51 could influence any of these processes. What was unique in the present study was that all study  
52  
53  
54  
55  
56  
57  
58  
59  
60

1  
2  
3 participants had been participants in a mammography screening programme, and we explored  
4 whether screening participation could have contributed to a diagnostic delay.

5  
6 Symptom interpretation of breast cancer may cause patient delay.<sup>8;12-14;23;24</sup> Palpable lumps are a  
7 well-known symptom of breast cancer that should induce seeking medical advice. All women in a  
8 Dutch study associated lumps with breast cancer.<sup>8</sup> However, studies vary in their conclusions about  
9 whether having a palpable lesion is associated with more or less delay than non-palpable symptoms.  
10  
11  
12  
13  
14  
15  
16  
17  
18  
19  
20  
21  
22  
23  
24  
25  
26  
27  
28  
29  
30  
31  
32  
33  
34  
35  
36  
37  
38  
39  
40  
41  
42  
43  
44  
45  
46  
47  
48  
49  
50  
51  
52  
53  
54  
55  
56  
57  
58  
59  
60  
16;25 In the present study, all the women referred to lumps when asked what had led to seeking  
medical advice. Other symptoms known to represent breast cancer, such as retraction of the nipple  
or skin, nipple discharge, skin discolouring or change in texture, mastalgia, a palpable lump in the  
axilla or a changed breast contour, had only been recognized as breast cancer symptoms after having  
the cancer diagnosis. For these women, participation in mammography screening might have  
increased awareness about self-examination for lumps but had apparently not increased knowledge  
of other symptoms.

Delay in seeking medical advice cannot be explained solely by lack of knowledge.<sup>26</sup> All the women  
knew that a lump could be a sign of cancer, and yet some delayed seeking medical help. Patient  
delay can depend on the patient's interpretation of bodily signs as related to cancer.<sup>22</sup> Although they  
knew in general that a lump could be a sign of cancer, some of the women did not immediately make  
that connection in their own case. As found in earlier studies, they did not expect to be ill and their  
current situation provided alternative explanations for their bodily experiences.<sup>12</sup> The present study  
indicates that participating in mammography screening may provide other explanations for bodily  
signs, since cancer had not been detected by mammography. Retrospective interpretations of bodily  
sensations as symptoms of breast cancer suggest that some had been reluctant to trust their own  
bodily sensations. In this sense mammography may contribute to medicalization, leaving women to  
trust medical technology over their own bodily sensations. Another interpretation is that they were  
too frightened by the prospect of having cancer to react to potential symptoms, in which case  
screening participation was not so much a contributing factor to delay as it was an available excuse  
to avoid contemplating cancer.

Seeing previous or upcoming mammography screening as reasons for delaying seeking medical  
advice about potential breast cancer suggests that too much trust in a public screening programme  
may contribute to delayed diagnosis. Though only a few women expressed such arguments, our  
study demonstrates their existence in the population. Trusting previous screens to be correct may  
have led to non-cancer interpretations of symptoms. Waiting for the next screening round instead of  
acting upon a palpable lump indicates high trust in the correctness of a biennial design.

1  
2  
3  
4  
5 Delay has been an essential concept throughout breast cancer history in the US.<sup>11</sup> Cultural studies of  
6 breast cancer have been scarce in Norway, but media campaigns against delayed diagnosis have  
7 been implemented. These women's delayed actions must be understood within such a broader  
8 cultural context. Discourses depicting breast cancer as a continuum have dominated in recent  
9 decades, making women's breasts objects of constant surveillance both by themselves and by  
10 others.<sup>10</sup> With a lack of clearly identified measures of primary prevention, surveillance becomes the  
11 sole option for responsible health behaviour. Although ten women in the present study claimed  
12 having delayed help-seeking, only two women delayed more than three months. Those who saw  
13 themselves as having delayed their active response had varied and complex arguments explaining  
14 their (in)actions while women who sought medical help immediately were certain they were doing  
15 the right thing.

16  
17  
18 Although the design of our study does not tell about the magnitude of the delay problem, it clearly  
19 identifies a problem which deserves closer attention. In line with conclusions from other studies<sup>27-29</sup>,  
20 it also points in the direction of an upgrading of the importance of women's self-examinations and of  
21 further education regarding breast cancer symptoms.

### 22 23 24 25 26 27 28 29 30 31 32 **Strengths and limitations**

33  
34 This qualitative interview study is unique in studying the experiences of women with interval cancer  
35 and how they related their experiences with breast cancer to mammography screening. Being  
36 interviewed about delaying seeking medical advice when detecting symptoms that later were  
37 diagnosed as cancer could be discomfoting for those feeling guilty about delaying, leading to  
38 answers masking guilt. A limitation to the current study is that it is based on women's retrospective  
39 reports. Some had been diagnosed up to three years prior to the interview. Experiences before  
40 having cancer may not be the most important to remember after going through intensive cancer  
41 treatment, and could have been reinterpreted several times since experiencing them.

42  
43  
44  
45  
46  
47  
48  
49  
50 Nearly 65 per cent of those invited to the study chose to participate. All women with interval cancer  
51 within a specific period in these communities were invited, but self-selection in responding to the  
52 invitation present a selection bias. It is a limitation to the study that we cannot compare those  
53 participating with the 14 non-respondents. Serious disease might have hindered participation.  
54  
55  
56 Despite their cancer diagnosis, only six of the 26 respondents were fully retired. In Norway, less than  
57 50 per cent of the population aged 55-74 were employed in 2005,<sup>30</sup> which indicates that participants  
58  
59  
60

1  
2  
3 in the present study could have been more resourceful than women in average. If diagnostic delay is  
4 a problem among the more resourceful segments of the population, it is reasonable to think that it is  
5 also present in the population in general.  
6  
7  
8  
9

10 We could expect potential cancer symptoms to be common in the population, as approximately 15  
11 per cent of the population at any time experience such symptoms.<sup>25</sup> Women with symptoms in-  
12 between screening rounds could be classified in three groups: women who receive an interval cancer  
13 diagnosis, women whose symptoms are diagnosed as benign, and women who delayed seeking  
14 medical advice until their next screening round. As only the first group were subjects of this study,  
15 more research on symptom interpretation among screening participants is warranted.  
16  
17  
18  
19

#### 20 Implications

21  
22 Confidence in mammography programmes influences the interpretation of breast cancer symptoms.  
23 Awareness of symptoms other than lumps must be improved. Though information leaflets provide  
24 information about interval breast cancer, screening participants might not read leaflets thoroughly.  
25 Additional information and reminders during mammography examinations could be one solution.  
26 Previous experiences of vague symptoms being set aside could lead women to neglect their own  
27 bodily sensations and prefer technology to give answers to their health status. In this qualitative  
28 study we have explored the women's own interpretation of help-seeking for interval breast cancer.  
29 Further studies are required as to whether their choice of actions have delayed diagnosis in medical  
30 terms, according to tumor characteristics and survival.  
31  
32  
33  
34  
35  
36  
37  
38  
39

#### 40 REFERENCES

- 41  
42  
43 (1) Tornberg S, Kemetli L, Ascunce N, Hofvind S, Anttila A, Seradour B et al. A pooled analysis of  
44 interval cancer rates in six European countries. *European Journal of Cancer Prevention* 2010;  
45 19(2):87-93.  
46  
47 (2) Zackrisson S, Janzon L, Manjer J, Andersson I. Improved survival rate for women with interval  
48 breast cancer - results from the breast cancer screening programme in Malmo, Sweden  
49 1976-1999. *Journal of Medical Screening* 2007; 14(3):138-143.  
50  
51 (3) Brekelmans CT, Peeters PH, Deurenberg JJ, Collette HJ. Survival in interval breast cancer in  
52 the DOM screening programme. *Eur J Cancer* 1995; 31A(11):1830-1835.  
53  
54 (4) Schroen AA, Wobbles T, van der Sluis RF. Interval carcinomas of the breast: a group with  
55 intermediate outcome. *J Surg Oncol* 1996; 63(3):141-144.  
56  
57  
58  
59  
60

- 1
- 2
- 3 (5) Bordas P, Jonsson H, Nystrom L, Lenner P. Survival from invasive breast cancer among  
4 interval cases in the mammography screening programmes of northern Sweden. *Breast*  
5 2007; 16(1):47-54.
- 6
- 7 (6) Rayson D, Payne JI, Abdolell M, Barnes PJ, MacIntosh RF, Foley T et al. Comparison of clinical-  
8 pathologic characteristics and outcomes of true interval and screen-detected invasive breast  
9 cancer among participants of a Canadian breast screening program: a nested case-control  
10 study. *Clin Breast Cancer* 2011; 11(1):27-32.
- 11
- 12 (7) Kirsh VA, Chiarelli AM, Edwards SA, O'Malley FP, Shumak RS, Yaffe MJ et al. Tumor  
13 characteristics associated with mammographic detection of breast cancer in the Ontario  
14 breast screening program. *J Natl Cancer Inst* 2011; 103(12):942-950.
- 15
- 16 (8) De Nooijer J, Lechner L, De Vries H. A qualitative study on detecting cancer symptoms and  
17 seeking medical help; an application of Andersen's model of total patient delay. *Patient*  
18 *Education and Counseling* 2001; 42(2):145-157.
- 19
- 20 (9) Lerner BH. The breast cancer wars. Hope, fear, and the pursuit of a cure in twentieth-century  
21 America. Oxford: Oxford University Press; 2001.
- 22
- 23 (10) Klawiter M. The biopolitics of breast cancer. Changing cultures of disease and activism.  
24 Minneapolis: University of Minnesota Press; 2008.
- 25
- 26 (11) Aronowitz RA. Do not delay: Breast cancer and time, 1900-1970. *Milbank Quarterly* 2001;  
27 79(3):355-386.
- 28
- 29 (12) Andersen RS, Paarup B, Vedsted P, Bro F, Soendergaard J. 'Containment' as an analytical  
30 framework for understanding patient delay: a qualitative study of cancer patients' symptom  
31 interpretation processes. *Soc Sci Med* 2010; 71(2):378-385.
- 32
- 33 (13) Sun Y, Knobf T. Concept Analysis of Symptom Disclosure in the Context of Cancer. *Advances*  
34 *in Nursing Science* 2008; 31(4):332-341.
- 35
- 36 (14) Andersen BL, Cacioppo JT. Delay in seeking a cancer diagnosis: delay stages and  
37 psychophysiological comparison processes. *Br J Soc Psychol* 1995; 34 ( Pt 1):33-52.
- 38
- 39 (15) Ristvedt SL, Trinkaus KM. Psychological factors related to delay in consultation for cancer  
40 symptoms. *Psychooncology* 2005; 14(5):339-350.
- 41
- 42 (16) Facione NC, Facione PA. The cognitive structuring of patient delay in breast cancer. *Social*  
43 *Science & Medicine* 2006; 63(12):3137-3149.
- 44
- 45 (17) De Nooijer J, Lechner L, De Vries H. Social psychological correlates of paying attention to  
46 cancer symptoms and seeking medical help. *Soc Sci Med* 2003; 56(5):915-920.
- 47
- 48 (18) de GR, van AE, Tilanus-Linthorst MM, Bartels CC, Boer R, Draisma G et al. Breast cancer  
49 screening: evidence for false reassurance? *Int J Cancer* 2008; 123(3):680-686.
- 50
- 51 (19) Solbjør M. "You Have to Have Trust in Those Pictures." A Perspective on Women's  
52 Experiences of Mammography Screening. In: Brownlie J, Greene A, Howson A, editors.  
53 Researching Trust and Health. London: Routledge; 2008.
- 54
- 55
- 56
- 57
- 58
- 59
- 60

- 1  
2  
3 (20) Coffey A, Atkinson P. Making sense of qualitative data. Complementary research strategies.  
4 Thousand Oaks: Sage Publications; 1996.  
5  
6 (21) Kvale S, Brinkmann S. Interviews. An introduction to qualitative research interviewing. 2 ed.  
7 London: Sage; 2008.  
8  
9 (22) Andersen RS, Vedsted P, Olesen F, Bro F, Sondergaard J. Patient delay in cancer studies: a  
10 discussion of methods and measures. *BMC Health Serv Res* 2009; 9:189.  
11  
12 (23) Simon AE, Waller J, Robb K, Wardle J. Patient delay in presentation of possible cancer  
13 symptoms: the contribution of knowledge and attitudes in a population sample from the  
14 United Kingdom. *Cancer Epidemiol Biomarkers Prev* 2010; 19(9):2272-2277.  
15  
16 (24) Rauscher GH, Ferrans CE, Kaiser K, Campbell RT, Calhoun EE, Warnecke RB. Misconceptions  
17 about breast lumps and delayed medical presentation in urban breast cancer patients.  
18 *Cancer Epidemiol Biomarkers Prev* 2010; 19(3):640-647.  
19  
20 (25) Macleod U, Mitchell ED, Burgess C, Macdonald S, Ramirez AJ. Risk factors for delayed  
21 presentation and referral of symptomatic cancer: evidence for common cancers. *Br J Cancer*  
22 2009; 101 Suppl 2:S92-S101.  
23  
24 (26) De Nooijer J, Lechner L, De Vries H. Help-seeking behaviour for cancer symptoms:  
25 Perceptions of patients and general practitioners. *Psycho-Oncology* 2001; 10(6):469-478.  
26  
27 (27) Carney PA, Steiner E, Goodrich ME, Dietrich AJ, Kasales CJ, Weiss JE et al. Discovery of breast  
28 cancers within 1 year of a normal screening mammogram: how are they found? *Ann Fam*  
29 *Med* 2006; 4(6):512-518.  
30  
31 (28) Haakinson DJ, Stucky CC, Dueck AC, Gray RJ, Wasif N, Apsey HA et al. A significant number of  
32 women present with palpable breast cancer even with a normal mammogram within 1 year.  
33 *Am J Surg* 2010; 200(6):712-717.  
34  
35 (29) Ma I, Dueck A, Gray R, Wasif N, Giurescu M, Lorans R et al. Clinical and self breast  
36 examination remain important in the era of modern screening. *Ann Surg Oncol* 2012;  
37 19(5):1484-1490.  
38  
39 (30) Villund O. Pensjoneringsalder - begreper, data, metoder. [73]. 2006. Statistics Norway. 25-8-  
40 2012.  
41  
42  
43  
44  
45  
46

47 Table 1 Description of treatment for breast cancer, self-reported.

| Treatment | Surgery | Surgery +<br>radiation | Surgery +<br>radiation +<br>chemo<br>therapy | Surgery +<br>chemo<br>therapy |  |
|-----------|---------|------------------------|----------------------------------------------|-------------------------------|--|
| Age       |         |                        |                                              |                               |  |

|       |            |            |             |           |            |
|-------|------------|------------|-------------|-----------|------------|
| 50-54 | 0          | 0          | 3           | 0         |            |
| 55-59 | 2          | 3          | 6           | 0         |            |
| 60-64 | 0          | 4          | 4           | 0         |            |
| 65-69 | 2          | 1          | 0           | 1         |            |
| Sum   | 4 (15,4 %) | 8 (30,8 %) | 13 (50,0 %) | 1 (3,8 %) | Total N=26 |

Table 2 Description of women who participated in study: age and help-seeking behaviour

| Reaction time | Detected though other medical examinations | 1-2 days    | Within 2 weeks | Less than 2 months | Approx 6 months |             |
|---------------|--------------------------------------------|-------------|----------------|--------------------|-----------------|-------------|
| Age           |                                            |             |                |                    |                 | Mean=59.4   |
| 50-54         | 0                                          | 2           | 0              | 1                  | 0               | 3 (11,5 %)  |
| 55-59         | 1                                          | 5           | 3              | 1                  | 1               | 11 (42,3 %) |
| 60-64         | 0                                          | 3           | 3              | 2                  | 0               | 8 (30,8 %)  |
| 65-69         | 1                                          | 1           | 0              | 1                  | 1               | 4 (15,4 %)  |
| Sum           | 2 (7,7 %)                                  | 11 (42,3 %) | 6 (23,0 %)     | 5 (19,2 %)         | 2 (7,7 %)       | Total N=26  |



## Title page

**Title:** Could screening participation bias symptom interpretation? An interview study on women's interpretations of and responses to cancer symptoms between mammography screening rounds.

**Authors:**

Solbjør, Marit; Post.doc-fellow, Norwegian University of Science and Technology, Medical Faculty, Department of Public Health and General Practice, Postbox 8905, MTF5, 7491 Trondheim.

Skolbekken, John-Arne; Associate Professor, Norwegian University of Science and Technology, Department of Social Work and Health Science, 7491 Trondheim.

Sætnan, Ann Rudinow; Professor, Norwegian University of Science and Technology, Department of Sociology and Political Science, 7491 Trondheim.

Hagen, Anne Irene; Researcher/Senior Consultant, Department of Breast and Endocrine Surgery, Trondheim University Hospital, Trondheim, Norway

Forsmo, Siri; Professor, Norwegian University of Science and Technology, Medical Faculty, Department of Public Health and General Practice, Postbox 8905, MTF5, 7491 Trondheim.

**E-mail corresponding author:** [Marit.Solbjor@ntnu.no](mailto:Marit.Solbjor@ntnu.no)

Phone: +47 73598905, Fax: +47 73597577

**Authorship-contributorship statement:** MS, SF and JAS planned and designed the study. AIH contributed with recruitment together with MS. MS conducted the interviews. All authors contributed to the analysis of data and in writing the article. All authors agree on the submission of the present manuscript. MS is responsible for the overall content as guarantor.

**Ethics approval:** The study was approved by the Regional committee for medical research ethics (REK midt) and informed consent was given by all participants.

**Funding:** The study was financed by the Norwegian Research Council (NFR) through the research-based evaluation of the Norwegian Breast Cancer Screening Programme. NFR had no involvement in the research process or writing of this article.

1  
2  
3 **Acknowledgement:** The breast diagnostic units at Nordland Hospital and Trondheim University  
4 Hospital provided valuable help with recruitment.  
5  
6

7  
8  
9 Number of words: 3332

10  
11 Number of tables: 2

12  
13 Running head: Could screening participation bias symptom interpretation?  
14

#### 15 16 17 **Article summary:**

##### 18 19 **Article Focus**

- 20  
21 • Interval breast cancer comprises 28 per cent of cancers among screened women in Europe.
- 22  
23 • Women who participate in mammography screening may delay acting upon breast cancer  
24 symptoms if they trust screening results to be correct.
- 25  
26 • We asked women with interval breast cancer how they had reacted to detecting symptoms  
27 of breast cancer in-between screening rounds.  
28  
29  
30  
31

##### 32 33 **Key Messages**

- 34  
35 • **Despite the last mammography screening being negative, most of the interviewed women**  
36 **interpreted lumps as breast cancer symptoms and sought medical advice rapidly. Some**  
37 **women defined themselves as delayers despite seeking medical advice less than three**  
38 **months after symptom presentation.**
- 39  
40 • Only a few women who detected symptoms of breast cancer in-between screening rounds  
41 delayed seeking medical advice due to **a recent negative screening result in the**  
42 **mammography screening programme.**
- 43  
44 • **Other symptoms than lumps were only acknowledged as cancer symptoms in retrospect.**  
45 **Screening seems a missed opportunity to inform women better about breast cancer**  
46 **symptoms.**  
47  
48  
49  
50  
51  
52  
53  
54

##### 55 56 **Strengths and limitations** 57 58 59 60

1  
2  
3 This qualitative interview study is unique in studying the experiences of women with interval cancer  
4 and how they related their experiences with breast cancer to mammography screening. A limitation  
5 to the current study is that it is based on women's retrospective reports. Self-selection in responding  
6 to the invitation present a selection bias; women with advanced cancer might not have participated  
7 in the study, and participants **may have been more** resourceful than average.  
8  
9  
10  
11  
12  
13  
14  
15  
16  
17  
18  
19  
20  
21  
22  
23  
24  
25  
26  
27  
28  
29  
30  
31  
32  
33  
34  
35  
36  
37  
38  
39  
40  
41  
42  
43  
44  
45  
46  
47  
48  
49  
50  
51  
52  
53  
54  
55  
56  
57  
58  
59  
60

For peer review only

## ABSTRACT

**Objectives** To explore **how women with negative mammography screening results, but who were later diagnosed with interval breast cancer, reacted when they observed breast symptoms that could indicate malignancy in-between screening rounds.**

**Design** Semi-structured individual interviews with women who have been diagnosed with breast cancer during mammography screening intervals.

**Setting** Two breast diagnostic units covering two counties in Norway.

**Participants** 26 women diagnosed with interval breast cancer.

**Results** Women with a screening negative result react in two ways when experiencing a possible symptom of breast cancer. Among 24 women with a self-detected palpable lesion, 14 sought medical advice immediately. Their argument was to dispose of potential cancer as soon as possible. Ten women delayed seeking medical advice, **explaining their delay as a result of practical difficulties such as holidays, uncertainty about the symptom, and previous experiences of health care services' ability to handle diffuse symptoms.** Also, a recent negative mammography scan led some women to assume that the palpable lesion was benign and wait for the next screening round.

**Conclusion** Participating in mammography screening may contribute to a postponed reaction to breast cancer symptoms, although most women acted rapidly when detecting a palpable breast lesion. Furthermore, screening participation does not necessarily increase awareness of breast cancer symptoms.

**Keywords:** Breast cancer, interval cancer, oncology, mammography, screening.

## INTRODUCTION

Mammography screening aims to provide a pre-symptomatic diagnosis of breast cancer. Nevertheless, interval cancer, which is cancer detected between screening rounds, comprises 28 per cent of cancers among screened women in Europe.<sup>1</sup> Survival rates for interval cancers have improved during recent decades<sup>2</sup>, **and it is controversial whether true interval cancers have less favourable prognosis than screening detected cancers or breast cancers diagnosed outside a screening programme.**<sup>3-5</sup> Rayson et al found poorer survival in true interval breast cancer compared to screen-detected cancers. The findings of adverse prognostic factors like higher grade and stage, receptor negativity and high mitotic index in true interval cancers might contribute to poorer survival outcome<sup>6,7</sup>. Diagnostic delay may also be a factor.

Diagnostic delay occurs at many stages of the cancer detection process.<sup>8</sup> We will here concentrate on **screening participants interpretation of bodily changes, and their help-seeking.** Early detection of breast cancer has been promoted throughout the 20<sup>th</sup> century, including women's responsibility to react upon a palpable breast lesion.<sup>9-11</sup> **Nevertheless, recognition of a breast cancer symptom is not always a straightforward process.** Cultural contexts influence symptom experiences and bodily signs become symptoms only after an interpretation that they are abnormal.<sup>8,12,13</sup> **The process from the onset of bodily changes until recognition of a symptom may be the period of time accounting for the greatest proportion of patient delay.**<sup>14,15</sup> **But even then, interpreting symptoms as cancer does not automatically lead to taking action.**<sup>13,16,17</sup>

**An argument for mammography screening is that it leads to earlier breast cancer detection compared with women's self-detection. The positive effect mammography may have on the time of detection must, however, be balanced against** whether patient delay could be induced by the reassurance given following a negative screening.<sup>18</sup> A previous qualitative study indicates that women trust mammography screening to provide true results about their breast status.<sup>19</sup> The question addressed in this article is whether screening participation interferes with the women's symptom interpretation and help seeking. **This study explores how women with negative mammography screening results who were later diagnosed with interval breast cancer, reacted when they observed** breast symptoms that could indicate malignancy in-between screening rounds.

## METHODS

This was a qualitative interview study with women who had experienced interval breast cancer within the Norwegian breast cancer screening programme. This is a nationwide, public screening

1  
2  
3 programme that offers mammography **biennially** for all women aged 50-69. The study was approved  
4 by the Regional Committee for Medical Research; **participation was based on written consent.**  
5  
6

#### 7 **Recruitment**

8 **Forty women diagnosed with interval cancer at two hospitals in Central and Northern Norway**  
9 **were invited to the study. During the years 2006-2009, 178 interval breast cancers were diagnosed**  
10 **at these two hospitals. Due to long distances and the low population density in rural Norway, all**  
11 **invited to the study lived in or near urban or semi-urban areas. In order to have the women's**  
12 **stories as close to the event as possible, they were the twenty women last diagnosed with interval**  
13 **breast cancer at each hospital, living in or nearby one of four cities (inhabitants 9,500-150,000),**  
14 **counting back from six months before the study invitation was sent. A total of 26 women accepted**  
15 **the invitation. Due to confidentiality regulations, we have no access to information about the 14**  
16 **women who did not respond to the invitation.**  
17  
18  
19  
20  
21  
22  
23

#### 24 **The interviews**

25  
26 Semi-structured interviews were carried out in 2009 by the first author (MS), at a hospital, a  
27 university, a hotel meeting room, or in the woman's home or workplace if requested. **Following a**  
28 **semi-structured interview guide, the women were invited to tell their breast cancer story,**  
29 **including what kind of breast cancer symptoms they had reacted to. Other questions were about**  
30 **their views on mammography screening and reactions upon having interval breast cancer.** Each  
31 interview lasted 45 to 60 minutes, and was audiotaped prior to being transcribed in verbatim. All  
32 informants have been given fictitious names to secure anonymity.  
33  
34  
35  
36  
37  
38  
39

#### 40 **Analysis**

41  
42 Two researchers read all the interviews independently, and all co-authors read some of the  
43 interviews. We used a method of constant comparison, comparing themes within and between  
44 interviews. All authors discussed themes arising from the interviews. We conducted thematic  
45 analysis.<sup>20</sup> Data were categorized using NVivo 8.0. Within each theme we found sub-themes which  
46 were subjected to meaning interpretation.<sup>21</sup>  
47  
48  
49  
50  
51  
52

## 53 **RESULTS**

### 54 **Participants**

55  
56  
57  
58  
59  
60

1  
2  
3 The 26 participating women were aged 53 to 69 years, in average 59.4. Twenty-four had discovered  
4 the symptoms of breast cancer themselves; two were detected during other medical examinations.  
5  
6 The women were diagnosed with breast cancer between three and 23 months after their last  
7 screening mammography and were interviewed from six to 36 months after diagnosis. **Based on the**  
8 **women's reports during** the interview, all had been surgically treated, either with mastectomy or  
9 with breast conserving surgery, 21 women had undergone radiation therapy, and 14 chemotherapy  
10 **(Table 1)**. Few women knew whether their malignant tumor represented a false negative  
11 mammography scan or a true interval cancer. **Some had asked for a review of previous images, but**  
12 **most did not mention the possibility of false negative screening when asked about their thoughts**  
13 **on having breast cancer between screening rounds.**  
14  
15  
16  
17  
18  
19

20  
21  
22 Fourteen had contacted the health care services within a week after noticing a palpable lump (Table  
23 2). Eight had waited between two weeks and three months before seeking medical advice, and two  
24 delayed more than three months. There were no differences in type of symptom between the  
25 immediate help-seekers and those waiting for weeks or months, as all talked about having a lump.  
26  
27 Two women retrospectively reported symptoms such as mastalgia or breast contour change, but  
28 they had not related this to breast cancer before being diagnosed. In the following we will present  
29 the women's own explanations for their timing when seeking medical advice.  
30  
31  
32  
33  
34  
35

### 36 **Seeking medical advice immediately**

37  
38 Those who saw themselves as having sought medical advice promptly had all called their doctor's  
39 office or the mammography clinic at the first opportunity or at least within a week of feeling a lump.

40  
41 *"I detected it at eleven p.m. And there I was, with a glowing phone at eight a.m. (Laughter) Next*  
42 *morning, straight to the GP."* (Johanne, 56)  
43  
44

45  
46 The women who contacted their doctor immediately had no doubt about the possibility of having  
47 cancer. For them delay was no option after detecting a lump. In retrospect they had been certain  
48 that it could be a symptom of breast cancer. Thoughts about having cancer made acting upon it the  
49 rational option.  
50  
51

52  
53 *"I was very quick to get to the GP. I was certain it was cancer right away. [...] I became very rational:*  
54 *Go to the clinic, make it go away."* (Vigdis, 62)  
55  
56  
57

### 58 **Postponing seeking medical advice**

59  
60

1  
2  
3 Ten of the women had waited between two weeks and six months before seeking medical advice.  
4 Some of the women reported that they reinterpreted embodied sensations as possible cancer  
5 symptoms in retrospect, after being diagnosed. Prior to feeling a lump, they had either not noticed  
6 these symptoms or at least not interpreted them as symptoms of cancer. **Each woman gave several**  
7 **explanations for what she retrospectively saw as her delay in help-seeking.**  
8  
9

#### 10 11 12 *Uncertainty about symptom*

13  
14  
15 All these women acknowledged that breast anomalies could often represent symptoms of breast  
16 cancer. However, their own bodily changes did not always stand out as definite symptoms. Being  
17 uncertain about the etiology of the breast change, it was initially interpreted as imaginary or  
18 something that could change back to normal.  
19  
20

21  
22 *"No you can't date it because you just sense it and consider it, and eventually it grows, so*  
23 *it could maybe have been a month or so. [...] Yes, because it could potentially regress."*  
24  
25  
26 *(Cecilie, 67)*  
27

28  
29 Olaug (63) and Eva (57) explained their lesions due to sore skin from a tight bra or to an inflammation  
30 of some kind, sensations and observations the women later reinterpreted as possible early  
31 symptoms of cancer. They delayed seeking medical advice as the symptoms appeared too vague, for  
32 instance having an unpleasant sensation in the breast, nausea or tiredness. **Their initial**  
33 **interpretations of their bodily sensations were framed by everyday experiences, as mentioned**  
34 **above. In hindsight, these bodily experiences were acknowledged as breast cancer symptoms.**  
35  
36  
37  
38  
39

#### 40 41 *Previous experiences*

42  
43 **Postponement of help seeking also occurred after a bodily sensation was identified as a potential**  
44 **symptom.** Previous negative experiences with health care services contributed to reluctance towards  
45 **seeking potentially** unnecessary medical examinations. Those with multiple experiences with illness  
46 and disease were tired of being in the patient role. Prior negative encounters with health care  
47 services following diffuse symptoms **resulted in a a threshold against** seeking help with diffuse  
48 breast cancer symptoms.  
49  
50  
51

52  
53 *"I thought it might be an inflammation because I have had **joint** inflammations before and*  
54 *maybe that could have spread. And it was sore too. And one isn't too happy to go running*  
55 *to the doctor either. I did that all the time when I was younger, before I was diagnosed*  
56 *with arthritis, and with all that pain, so I'd rather not go (laughter). I got so tired when*  
57  
58  
59  
60



1  
2  
3 *they never could detect what was wrong with me and I got all kinds of medications which*  
4 *damaged... [...] So I am glad when I feel healthy and don't have to go."*(Eva, 57)  
5  
6

7 Having had frequent visits to the GP made some uneasy about being seen as whimpering. This  
8 suggests that "be a whimperer" or seeking health care services unnecessary were incoherent with  
9 their identity. **Rather than be perceived as hypochondriacs, they would delay help-seeking for**  
10 **uncertain symptoms.**  
11  
12

### 13 *Practical reasons*

14  
15  
16  
17  
18 There were also practical reasons given for delaying seeking medical advice. Two women had already  
19 a scheduled appointment with their GP when they detected a lump. Both waited until the  
20 appointment before bringing the lump to the doctor's attention.  
21  
22

23  
24  
25 *"I had an appointment with the GP a few weeks after, so I waited until then. It was*  
26 *probably nothing anyway."*(Gudrun, 60)  
27  
28

29  
30  
31 Noticing a lump during holidays also led to a delay in seeing the doctor. Actions after finding a lump  
32 were not solely about the lesion, but also about their social situation. Practical reasons were  
33 intertwined with other explanations such as interpreting the mass as benign or non-existent.  
34  
35

### 36 *Mammography screening*

37  
38  
39  
40 For some of the women the essential argument for delaying was related to having participated in  
41 mammography screening. Two different time frames were important for this argument. One was  
42 about having had a negative mammography in the recent past. The other was about an upcoming  
43 mammography. Having recently had a mammography scan led some to interpret the newly  
44 discovered lump as harmless. Having trusted mammography to detect even non-palpable lumps,  
45 some of the women experienced it as strange that cancer had not been found at the screening.  
46  
47  
48  
49 Petra, for instance, detected a lesion in April, but delayed acting upon it until October.  
50  
51

52  
53  
54 *"I wonder if it [last mammography screening] wasn't in January that year. And that was*  
55 *probably the reason for my interpretation. Because I thought that when they hadn't seen*  
56 *anything then, it could not be anything now."* (Petra, 66)  
57  
58  
59  
60

1  
2  
3  
4  
5 Being part of a screening programme **thus contributed to some women's interpretation of** bodily  
6 signs as not being breast cancer symptoms. One woman presented a forward-looking argument for  
7 delaying. She had started to wait for a screening invitation, but after several months with a growing  
8 tumour she called the screening unit asking for **the next screening appointment.**  
9  
10

11  
12  
13  
14 *"I started to wait for the [mammography] bus that used to come, but it never came. Right?*  
15 *It was too long to wait, because I felt this... [...] Yes, because I'm usually called in. So I*  
16 *called the hospital and asked them when the bus was due, and they said that it would not*  
17 *come until later that year, and she asked me if there was something specific I had on my*  
18 *mind? So I told her I had pain in a breast, but that I knew it isn't any danger when it hurts.*  
19 *"Go see a doctor", she said. So I called my GP that day, and got an appointment the next*  
20 *day." (Inger, 56)*  
21  
22  
23  
24  
25  
26  
27

28 Even when interpreting her lump as potential cancer, Inger delayed acting on it as she waited for the  
29 screening programme to act. **Both women who had waited six months before seeking medical**  
30 **advice explained their delay with their screening participation. This suggests that some**  
31 **participants place too much trust in the cancer detection capabilities of the screening programme.**  
32  
33  
34  
35  
36  
37

## 38 **DISCUSSION**

39  
40 From this qualitative interview study we found that ten of 24 women who had been mammography  
41 screening participants put off seeking medical advice when detecting a palpable lump. **True interval**  
42 **breast cancer could have poorer survival compared to screen-detected cancers.<sup>6</sup> Delaying acting on**  
43 **a breast cancer symptom between screening rounds could potentially decrease survival.** Medically  
44 defined, diagnostic delay is waiting more than three months with a symptom before help-seeking.  
45 Though only two among **these 26 women fell within this definition, eight further** women who had  
46 not acted immediately considered themselves to have delayed the diagnosis. The four main reasons  
47 for waiting to seek medical advice were uncertainty about symptom interpretation, practical reasons,  
48 previous negative experiences, and being participants of mammography screening. In order to self-  
49 detect cancer, individuals must sense a symptom, acknowledge it as such, and take action to seek  
50 medical advice.<sup>22</sup> It has hitherto not been known whether participating in mammography screening  
51 could influence any of these processes. What was unique in the present study was that all study  
52  
53  
54  
55  
56  
57  
58  
59  
60

1  
2  
3 participants had been participants in a mammography screening programme, and we explored  
4 whether screening participation could have contributed to a diagnostic delay.

5  
6 Symptom interpretation of breast cancer may cause patient delay.<sup>8;12-14;23;24</sup> Palpable lumps are a  
7 well-known symptom of breast cancer that should induce seeking medical advice. All women in a  
8 Dutch study associated lumps with breast cancer.<sup>8</sup> However, studies vary in their conclusions about  
9 whether having a palpable lesion is associated with more or less delay than non-palpable symptoms.  
10  
11  
12  
13  
14  
15  
16  
17  
18  
19  
20  
21  
22  
23  
24  
25  
26  
27  
28  
29  
30  
31  
32  
33  
34  
35  
36  
37  
38  
39  
40  
41  
42  
43  
44  
45  
46  
47  
48  
49  
50  
51  
52  
53  
54  
55  
56  
57  
58  
59  
60  
In the present study, all the women referred to lumps when asked what had led to seeking  
medical advice. Other **symptoms known to represent breast cancer, such as retraction of the nipple  
or skin, nipple discharge, skin discolouring or change in texture, mastalgia, a palpable lump in the  
axilla or a changed breast contour, had only been recognized as breast cancer symptoms after  
having the cancer diagnosis.** For these women, participation in mammography screening might have  
increased awareness about self-examination for lumps but had apparently not increased knowledge  
of other symptoms.

Delay in seeking medical advice cannot be explained solely by lack of knowledge.<sup>26</sup> All the women  
knew that a lump could be a sign of cancer, and yet some delayed seeking medical help. Patient  
delay can depend on the patient's interpretation of bodily signs as related to cancer.<sup>22</sup> Although they  
knew in general that a lump could be a sign of cancer, some of the women did not immediately make  
that connection in their own case. As found in earlier studies, they did not expect to be ill and their  
current situation provided alternative explanations for their bodily experiences.<sup>12</sup> The present study  
indicates that participating in mammography screening may provide other explanations for bodily  
signs, since cancer had not been detected by mammography. Retrospective interpretations of bodily  
sensations as symptoms of breast cancer suggest that some had been reluctant to trust their own  
bodily sensations. In this sense mammography may contribute to medicalization, leaving women to  
trust medical technology over their own bodily sensations. Another interpretation is that they were  
too frightened by the prospect of having cancer to react to potential symptoms, in which case  
screening participation was not so much a contributing factor to delay as it was an available excuse  
to avoid contemplating cancer.

**Seeing previous or upcoming mammography screening as reasons for delaying seeking medical  
advice about potential breast cancer suggests that too much trust in a public screening programme  
may contribute to delayed diagnosis.** Though only a few women expressed such arguments, our  
study **demonstrates** their existence in the population. Trusting previous screens to be correct may  
have led to non-cancer interpretations of symptoms. Waiting for the next screening round instead of  
acting upon a palpable lump indicates high trust in the correctness of a **biennial** design.

1  
2  
3  
4  
5 Delay has been an essential concept throughout breast cancer history in the US.<sup>11</sup> Cultural studies of  
6 breast cancer have been scarce in Norway, but media campaigns against delayed diagnosis have  
7 been implemented. These women's delayed actions must be understood within such a broader  
8 cultural context. **Discourses depicting breast cancer as a continuum have dominated in recent**  
9 **decades, making women's breasts objects of** constant surveillance both by themselves and by  
10 others.<sup>10</sup> **With a lack of clearly identified measures of primary prevention,** surveillance becomes the  
11 sole option for responsible health behaviour. Although ten women in the present study claimed  
12 having delayed help-seeking, only two women delayed more than three months. Those who saw  
13 themselves as having **delayed their active response** had varied and complex arguments explaining  
14 their (in)actions while women who sought medical help immediately were certain they were doing  
15 the right thing.

16  
17  
18 **Although the design of our study does not tell about the magnitude of the delay problem, it clearly**  
19 **identifies a problem which deserves closer attention. In line with conclusions from other studies**<sup>27-</sup>  
20 <sup>29</sup>, **it also points in the direction of an upgrading of the importance of women's self-examinations**  
21 **and of further education regarding breast cancer symptoms.**

### 22 23 24 25 26 27 28 29 30 31 32 **Strengths and limitations**

33  
34 This qualitative interview study is unique in studying the experiences of women with interval cancer  
35 and how they related their experiences with breast cancer to mammography screening. Being  
36 interviewed about delaying seeking medical advice when detecting symptoms that later were  
37 diagnosed as cancer could be discomfoting for those feeling guilty about delaying, leading to  
38 answers masking guilt. A limitation to the current study is that it is based on women's retrospective  
39 reports. Some had been diagnosed up to three years prior to the interview. **Experiences before**  
40 **having cancer** may not be the most important to remember after going through intensive cancer  
41 treatment, and could have been reinterpreted several times since experiencing them.

42  
43  
44  
45  
46  
47  
48  
49  
50 Nearly 65 per cent of those invited to the study chose to participate. All women with interval cancer  
51 within a specific period in these communities were invited, but self-selection in responding to the  
52 invitation present a selection bias. **It is a limitation to the study that we cannot compare those**  
53 **participating with the 14 non-respondents. Serious disease might have hindered participation.**  
54  
55  
56  
57  
58  
59  
60 Despite their cancer diagnosis, only six of **the 26 respondents were fully retired. In Norway, less**  
60 **than 50 per cent of the population aged 55-74 were employed in 2005,**<sup>30</sup> which indicates that

1  
2  
3 participants in the present study could have been more resourceful than women in average. If  
4 diagnostic delay is a problem among the more resourceful segments of the population, it is  
5 reasonable to think that it is also present in the population in general.  
6  
7  
8  
9

10 We could expect potential cancer symptoms to be common in the population, as approximately 15  
11 per cent of the population at any time experience such symptoms.<sup>25</sup> Women with symptoms in-  
12 between screening rounds could be classified in three groups: women who receive an interval cancer  
13 diagnosis, women **whose symptoms are diagnosed as benign**, and women who delayed seeking  
14 medical advice until their next screening round. As only the first group were subjects of this study,  
15 more research on symptom interpretation among screening participants is warranted.  
16  
17  
18  
19

### 20 **Implications**

21  
22 Confidence in mammography programmes influences the interpretation of breast cancer symptoms.  
23 Awareness of symptoms other than lumps must be improved. Though information leaflets provide  
24 information about interval breast cancer, screening participants might not read leaflets thoroughly.  
25 Additional information and reminders during mammography examinations could be one solution.  
26 Previous experiences of vague symptoms being set aside could lead women to neglect their own  
27 bodily sensations and prefer technology to give answers to their health status. **In this qualitative**  
28 **study we have explored the women's own interpretation of help-seeking for interval breast cancer.**  
29 **Further studies are required as to whether their choice of actions have delayed diagnosis in**  
30 **medical terms, according to tumor characteristics and survival.**  
31  
32  
33  
34  
35  
36  
37  
38  
39

### 40 **REFERENCES**

- 41  
42  
43 (1) Tornberg S, Kemetli L, Ascunce N, Hofvind S, Anttila A, Seradour B et al. A pooled analysis of  
44 interval cancer rates in six European countries. *European Journal of Cancer Prevention* 2010;  
45 19(2):87-93.  
46  
47 (2) Zackrisson S, Janzon L, Manjer J, Andersson I. Improved survival rate for women with interval  
48 breast cancer - results from the breast cancer screening programme in Malmo, Sweden  
49 1976-1999. *Journal of Medical Screening* 2007; 14(3):138-143.  
50  
51 (3) Brekelmans CT, Peeters PH, Deurenberg JJ, Collette HJ. Survival in interval breast cancer in  
52 the DOM screening programme. *Eur J Cancer* 1995; 31A(11):1830-1835.  
53  
54 (4) Schroen AA, Wobbles T, van der Sluis RF. Interval carcinomas of the breast: a group with  
55 intermediate outcome. *J Surg Oncol* 1996; 63(3):141-144.  
56  
57  
58  
59  
60

- 1
- 2
- 3 (5) Bordas P, Jonsson H, Nystrom L, Lenner P. Survival from invasive breast cancer among
- 4 interval cases in the mammography screening programmes of northern Sweden. *Breast*
- 5 2007; 16(1):47-54.
- 6
- 7 (6) Rayson D, Payne JI, Abdoell M, Barnes PJ, MacIntosh RF, Foley T et al. Comparison of clinical-
- 8 pathologic characteristics and outcomes of true interval and screen-detected invasive breast
- 9 cancer among participants of a Canadian breast screening program: a nested case-control
- 10 study. *Clin Breast Cancer* 2011; 11(1):27-32.
- 11
- 12 (7) Kirsh VA, Chiarelli AM, Edwards SA, O'Malley FP, Shumak RS, Yaffe MJ et al. Tumor
- 13 characteristics associated with mammographic detection of breast cancer in the Ontario
- 14 breast screening program. *J Natl Cancer Inst* 2011; 103(12):942-950.
- 15
- 16 (8) De Nooijer J, Lechner L, De Vries H. A qualitative study on detecting cancer symptoms and
- 17 seeking medical help; an application of Andersen's model of total patient delay. *Patient*
- 18 *Education and Counseling* 2001; 42(2):145-157.
- 19
- 20 (9) Lerner BH. The breast cancer wars. Hope, fear, and the pursuit of a cure in twentieth-century
- 21 America. Oxford: Oxford University Press; 2001.
- 22
- 23 (10) Klawiter M. The biopolitics of breast cancer. Changing cultures of disease and activism.
- 24 Minneapolis: University of Minnesota Press; 2008.
- 25
- 26 (11) Aronowitz RA. Do not delay: Breast cancer and time, 1900-1970. *Milbank Quarterly* 2001;
- 27 79(3):355-386.
- 28
- 29 (12) Andersen RS, Paarup B, Vedsted P, Bro F, Soendergaard J. 'Containment' as an analytical
- 30 framework for understanding patient delay: a qualitative study of cancer patients' symptom
- 31 interpretation processes. *Soc Sci Med* 2010; 71(2):378-385.
- 32
- 33 (13) Sun Y, Knobf T. Concept Analysis of Symptom Disclosure in the Context of Cancer. *Advances*
- 34 *in Nursing Science* 2008; 31(4):332-341.
- 35
- 36 (14) Andersen BL, Cacioppo JT. Delay in seeking a cancer diagnosis: delay stages and
- 37 psychophysiological comparison processes. *Br J Soc Psychol* 1995; 34 ( Pt 1):33-52.
- 38
- 39 (15) Ristvedt SL, Trinkaus KM. Psychological factors related to delay in consultation for cancer
- 40 symptoms. *Psychooncology* 2005; 14(5):339-350.
- 41
- 42 (16) Facione NC, Facione PA. The cognitive structuring of patient delay in breast cancer. *Social*
- 43 *Science & Medicine* 2006; 63(12):3137-3149.
- 44
- 45 (17) De Nooijer J, Lechner L, De Vries H. Social psychological correlates of paying attention to
- 46 cancer symptoms and seeking medical help. *Soc Sci Med* 2003; 56(5):915-920.
- 47
- 48 (18) de GR, van AE, Tilanus-Linthorst MM, Bartels CC, Boer R, Draisma G et al. Breast cancer
- 49 screening: evidence for false reassurance? *Int J Cancer* 2008; 123(3):680-686.
- 50
- 51 (19) Solbjør M. "You Have to Have Trust in Those Pictures." A Perspective on Women's
- 52 Experiences of Mammography Screening. In: Brownlie J, Greene A, Howson A, editors.
- 53 *Researching Trust and Health*. London: Routledge; 2008.
- 54
- 55
- 56
- 57
- 58
- 59
- 60

- 1  
2  
3 (20) Coffey A, Atkinson P. Making sense of qualitative data. Complementary research strategies. Thousand Oaks: Sage Publications; 1996.  
4  
5  
6 (21) Kvale S, Brinkmann S. Interviews. An introduction to qualitative research interviewing. 2 ed. London: Sage; 2008.  
7  
8  
9 (22) Andersen RS, Vedsted P, Olesen F, Bro F, Sondergaard J. Patient delay in cancer studies: a discussion of methods and measures. *BMC Health Serv Res* 2009; 9:189.  
10  
11  
12 (23) Simon AE, Waller J, Robb K, Wardle J. Patient delay in presentation of possible cancer symptoms: the contribution of knowledge and attitudes in a population sample from the United Kingdom. *Cancer Epidemiol Biomarkers Prev* 2010; 19(9):2272-2277.  
13  
14  
15 (24) Rauscher GH, Ferrans CE, Kaiser K, Campbell RT, Calhoun EE, Warnecke RB. Misconceptions about breast lumps and delayed medical presentation in urban breast cancer patients. *Cancer Epidemiol Biomarkers Prev* 2010; 19(3):640-647.  
16  
17  
18 (25) Macleod U, Mitchell ED, Burgess C, Macdonald S, Ramirez AJ. Risk factors for delayed presentation and referral of symptomatic cancer: evidence for common cancers. *Br J Cancer* 2009; 101 Suppl 2:S92-S101.  
19  
20  
21 (26) De Nooijer J, Lechner L, De Vries H. Help-seeking behaviour for cancer symptoms: Perceptions of patients and general practitioners. *Psycho-Oncology* 2001; 10(6):469-478.  
22  
23  
24 (27) Carney PA, Steiner E, Goodrich ME, Dietrich AJ, Kasales CJ, Weiss JE et al. Discovery of breast cancers within 1 year of a normal screening mammogram: how are they found? *Ann Fam Med* 2006; 4(6):512-518.  
25  
26  
27 (28) Haakinson DJ, Stucky CC, Dueck AC, Gray RJ, Wasif N, Apsey HA et al. A significant number of women present with palpable breast cancer even with a normal mammogram within 1 year. *Am J Surg* 2010; 200(6):712-717.  
28  
29  
30 (29) Ma I, Dueck A, Gray R, Wasif N, Giurescu M, Lorans R et al. Clinical and self breast examination remain important in the era of modern screening. *Ann Surg Oncol* 2012; 19(5):1484-1490.  
31  
32  
33 (30) Villund O. Pensjoneringsalder - begreper, data, metoder. [73]. 2006. Statistics Norway. 25-8-2012.  
34  
35  
36  
37  
38  
39  
40  
41  
42  
43  
44  
45  
46

47 **Table 1 Description of treatment for breast cancer, self-reported.**

| Treatment | Surgery | Surgery + radiation | Surgery + radiation + chemotherapy | Surgery + chemotherapy |  |
|-----------|---------|---------------------|------------------------------------|------------------------|--|
| Age       |         |                     |                                    |                        |  |

|            |                   |                   |                    |                  |                   |
|------------|-------------------|-------------------|--------------------|------------------|-------------------|
| 50-54      | 0                 | 0                 | 3                  | 0                |                   |
| 55-59      | 2                 | 3                 | 6                  | 0                |                   |
| 60-64      | 0                 | 4                 | 4                  | 0                |                   |
| 65-69      | 2                 | 1                 | 0                  | 1                |                   |
| <b>Sum</b> | <b>4 (15,4 %)</b> | <b>8 (30,8 %)</b> | <b>13 (50,0 %)</b> | <b>1 (3,8 %)</b> | <b>Total N=26</b> |

**Table 2 Description of women who participated in study: age and help-seeking behaviour**

| <b>Reaction time</b> | <b>Detected though other medical examinations</b> | <b>1-2 days</b>    | <b>Within 2 weeks</b> | <b>Less than 2 months</b> | <b>Approx 6 months</b> |                   |
|----------------------|---------------------------------------------------|--------------------|-----------------------|---------------------------|------------------------|-------------------|
| <b>Age</b>           |                                                   |                    |                       |                           |                        | Mean=59.4         |
| 50-54                | 0                                                 | 2                  | 0                     | 1                         | 0                      | 3 (11,5 %)        |
| 55-59                | 1                                                 | 5                  | 3                     | 1                         | 1                      | 11 (42,3 %)       |
| 60-64                | 0                                                 | 3                  | 3                     | 2                         | 0                      | 8 (30,8 %)        |
| 65-69                | 1                                                 | 1                  | 0                     | 1                         | 1                      | 4 (15,4 %)        |
| <b>Sum</b>           | <b>2 (7,7 %)</b>                                  | <b>11 (42,3 %)</b> | <b>6 (23,0 %)</b>     | <b>5 (19,2 %)</b>         | <b>2 (7,7 %)</b>       | <b>Total N=26</b> |





**Could screening participation bias symptom interpretation?  
An interview study on women's interpretations of and  
responses to cancer symptoms between mammography  
screening rounds.**

|                                 |                                                                                                                                                                                                                                                                                                                                                                                                                                                                                                                                                      |
|---------------------------------|------------------------------------------------------------------------------------------------------------------------------------------------------------------------------------------------------------------------------------------------------------------------------------------------------------------------------------------------------------------------------------------------------------------------------------------------------------------------------------------------------------------------------------------------------|
| Journal:                        | <i>BMJ Open</i>                                                                                                                                                                                                                                                                                                                                                                                                                                                                                                                                      |
| Manuscript ID:                  | bmjopen-2012-001508.R2                                                                                                                                                                                                                                                                                                                                                                                                                                                                                                                               |
| Article Type:                   | Research                                                                                                                                                                                                                                                                                                                                                                                                                                                                                                                                             |
| Date Submitted by the Author:   | 02-Oct-2012                                                                                                                                                                                                                                                                                                                                                                                                                                                                                                                                          |
| Complete List of Authors:       | Solbjør, Marit; Norwegian University of Science and Technology, Public Health and General Practice<br>Skolbekken, John-Arne; Norwegian University of Science and Technology, Department of Social Work and Health Sciences<br>Sætnan, Ann; Norwegian University of Science and Technology, Department of Sociology and Political Science<br>Hagen, Anne; Trondheim University Hospital, Department of Breast and Endocrine Surgery<br>Forsmo, Siri; Norwegian University of Science and Technology, Department of Public Health and General Practice |
| <b>Primary Subject Heading</b>: | Oncology                                                                                                                                                                                                                                                                                                                                                                                                                                                                                                                                             |
| Secondary Subject Heading:      | Health policy, Qualitative research, Sociology                                                                                                                                                                                                                                                                                                                                                                                                                                                                                                       |
| Keywords:                       | Screening, Breast cancer, Interval cancer, Qualitative study, mammography                                                                                                                                                                                                                                                                                                                                                                                                                                                                            |
|                                 |                                                                                                                                                                                                                                                                                                                                                                                                                                                                                                                                                      |

SCHOLARONE™  
Manuscripts

## Title page

**Title:** Could screening participation bias symptom interpretation? An interview study on women's interpretations of and responses to cancer symptoms between mammography screening rounds.

**Authors:**

Solbjør, Marit; Post.doc-fellow, Norwegian University of Science and Technology, Medical Faculty, Department of Public Health and General Practice, Postbox 8905, MTFS, 7491 Trondheim.

Skolbekken, John-Arne; Associate Professor, Norwegian University of Science and Technology, Department of Social Work and Health Science, 7491 Trondheim.

Sætnan, Ann Rudinow; Professor, Norwegian University of Science and Technology, Department of Sociology and Political Science, 7491 Trondheim.

Hagen, Anne Irene; Researcher/Senior Consultant, Department of Breast and Endocrine Surgery, Trondheim University Hospital, Trondheim, Norway

Forsmo, Siri; Professor, Norwegian University of Science and Technology, Medical Faculty, Department of Public Health and General Practice, Postbox 8905, MTFS, 7491 Trondheim.

**E-mail corresponding author:** [Marit.Solbjor@ntnu.no](mailto:Marit.Solbjor@ntnu.no)

Phone: +47 73598905, Fax: +47 73597577

**Authorship-contributorship statement:** MS, SF and JAS planned and designed the study. AIH contributed with recruitment together with MS. MS conducted the interviews. All authors contributed to the analysis of data and in writing the article. All authors agree on the submission of the present manuscript. MS is responsible for the overall content as guarantor.

**Ethics approval:** The study was approved by the Regional committee for medical research ethics (REK midt) and informed consent was given by all participants.

**Funding:** The study was financed by the Norwegian Research Council (NFR) through the research-based evaluation of the Norwegian Breast Cancer Screening Programme. NFR had no involvement in the research process or writing of this article.

1  
2  
3 **Acknowledgement:** The breast diagnostic units at Nordland Hospital and Trondheim University  
4 Hospital provided valuable help with recruitment.  
5

6 **Data Sharing:** Unpublished data from the transcribed qualitative interviews are available to  
7 researchers in the research team.  
8  
9

10 **Competing Interests:** There are no competing interests.  
11  
12

13  
14 Number of words: 3379  
15

16 Number of tables: 2  
17

18 Running head: Could screening participation bias symptom interpretation?  
19  
20

## 21 22 23 **Article summary:**

### 24 25 **Article Focus**

- 26 • Interval breast cancer comprises 28 per cent of cancers among screened women in Europe.
- 27
- 28 • Women who participate in mammography screening may delay acting upon breast cancer
- 29 symptoms if they trust screening results to be correct.
- 30
- 31 • We asked women with interval breast cancer how they had reacted to detecting symptoms
- 32 of breast cancer in-between screening rounds.
- 33
- 34
- 35
- 36
- 37
- 38
- 39

### 40 41 **Key Messages**

- 42 • Despite the last mammography screening being negative, most of the interviewed women
- 43 interpreted lumps as breast cancer symptoms and sought medical advice rapidly. Some
- 44 women defined themselves as delayers despite seeking medical advice less than three
- 45 months after symptom presentation.
- 46
- 47
- 48 • Only a few women who detected symptoms of breast cancer in-between screening rounds
- 49 delayed seeking medical advice due to a recent negative screening result in the
- 50 mammography screening programme.
- 51
- 52 • Other symptoms than lumps were only acknowledged as cancer symptoms in retrospect.
- 53 Screening seems a missed opportunity to inform women better about breast cancer
- 54 symptoms.
- 55
- 56
- 57
- 58
- 59
- 60

**Strengths and limitations**

This qualitative interview study is unique in studying the experiences of women with interval cancer and how they related their experiences with breast cancer to mammography screening. A limitation to the current study is that it is based on women's retrospective reports. Self-selection in responding to the invitation present a selection bias; women with advanced cancer might not have participated in the study, and participants may have been more resourceful than average.

For peer review only

## ABSTRACT

**Objectives** To explore how women with negative mammography screening results, but who were later diagnosed with interval breast cancer, reacted when they observed breast symptoms that could indicate malignancy in-between screening rounds.

**Design** Semi-structured individual interviews with women who have been diagnosed with breast cancer during mammography screening intervals.

**Setting** Two breast diagnostic units covering two counties in Norway.

**Participants** 26 women diagnosed with interval breast cancer.

**Results** Women with a screening negative result react in two ways when experiencing a possible symptom of breast cancer. Among 24 women with a self-detected palpable lesion, 14 sought medical advice immediately. Their argument was to dispose of potential cancer as soon as possible. Ten women delayed seeking medical advice, explaining their delay as a result of practical difficulties such as holidays, uncertainty about the symptom, and previous experiences of health care services' ability to handle diffuse symptoms. Also, a recent negative mammography scan led some women to assume that the palpable lesion was benign and wait for the next screening round.

**Conclusion** Participating in mammography screening may contribute to a postponed reaction to breast cancer symptoms, although most women acted rapidly when detecting a palpable breast lesion. Furthermore, screening participation does not necessarily increase awareness of breast cancer symptoms.

**Keywords:** Breast cancer, interval cancer, oncology, mammography, screening.

## INTRODUCTION

Mammography screening aims to provide a pre-symptomatic diagnosis of breast cancer. Nevertheless, interval cancer, which is cancer detected between screening rounds, comprises 28 per cent of cancers among screened women in Europe.<sup>1</sup> Survival rates for interval cancers have improved during recent decades<sup>2</sup>, and it is controversial whether true interval cancers have less favourable prognosis than screening detected cancers or breast cancers diagnosed outside a screening programme.<sup>3-5</sup> Rayson et al found poorer survival in true interval breast cancer compared to screen-detected cancers. The findings of adverse prognostic factors like higher grade and stage, receptor negativity and high mitotic index in true interval cancers might contribute to poorer survival outcome.<sup>6,7</sup> On the other side, survival rates in the screen detected groups are biased (lead and length time bias and overdiagnosis), leading to misinterpretation of the true effectiveness of screening.<sup>8</sup> It should not be excluded, however, that diagnostic delay due to a recent negative mammogram may be an important factor in poorer survival rates.

Diagnostic delay occurs at many stages of the cancer detection process.<sup>9</sup> We will here concentrate on screening participants interpretation of bodily changes, and their help-seeking. Early detection of breast cancer has been promoted throughout the 20<sup>th</sup> century, including women's responsibility to react upon a palpable breast lesion.<sup>10-12</sup> Nevertheless, recognition of a breast cancer symptom is not always a straightforward process. Cultural contexts influence symptom experiences and bodily signs become symptoms only after an interpretation that they are abnormal.<sup>9,13,14</sup> The process from the onset of bodily changes until recognition of a symptom may be the period of time accounting for the greatest proportion of patient delay.<sup>15,16</sup> But even then, interpreting symptoms as cancer does not automatically lead to taking action.<sup>14,17,18</sup>

An argument for mammography screening is that it leads to earlier breast cancer detection compared with women's self-detection. The positive effect mammography may have on the time of detection must, however, be balanced against whether patient delay could be induced by the reassurance given following a negative screening.<sup>19</sup> A previous qualitative study indicates that women trust mammography screening to provide true results about their breast status.<sup>20</sup> The question addressed in this article is whether screening participation interferes with the women's symptom interpretation and help seeking. This study explores how women with negative mammography screening results who were later diagnosed with interval breast cancer, reacted when they observed breast symptoms that could indicate malignancy in-between screening rounds.

## **METHODS**

This was a qualitative interview study with women who had experienced interval breast cancer within the Norwegian breast cancer screening programme. This is a nationwide, public screening programme that offers mammography biennially for all women aged 50-69. The study was approved by the Regional Committee for Medical Research; participation was based on written consent.

### **Recruitment**

Forty women diagnosed with interval cancer at two hospitals in Central and Northern Norway were invited to the study. During the years 2006-2009, 178 interval breast cancers were diagnosed at these two hospitals. Due to long distances and the low population density in rural Norway, all invited to the study lived in or near urban or semi-urban areas. In order to have the women's stories as close to the event as possible, they were the twenty women last diagnosed with interval breast cancer at each hospital, living in or nearby one of four cities (inhabitants 9,500-150,000), counting back from six months before the study invitation was sent. A total of 26 women accepted the invitation. Due to confidentiality regulations, we have no access to information about the 14 women who did not respond to the invitation.

### **The interviews**

Semi-structured interviews were carried out in 2009 by the first author (MS), at a hospital, a university, a hotel meeting room, or in the woman's home or workplace if requested. Following a semi-structured interview guide, the women were invited to tell their breast cancer story, including what kind of breast cancer symptoms they had reacted to. Other questions were about their views on mammography screening and reactions upon having interval breast cancer. Each interview lasted 45 to 60 minutes, and was audiotaped prior to being transcribed in verbatim. All informants have been given fictitious names to secure anonymity.

### **Analysis**

Two researchers read all the interviews independently, and all co-authors read some of the interviews. We used a method of constant comparison, comparing themes within and between interviews. All authors discussed themes arising from the interviews. We conducted thematic analysis.<sup>21</sup> Data were categorized using NVivo 8.0. Within each theme we found sub-themes which were subjected to meaning interpretation.<sup>22</sup>

## RESULTS

### Participants

The 26 participating women were aged 53 to 69 years, in average 59.4. Twenty-four had discovered the symptoms of breast cancer themselves; two were detected during other medical examinations. The women were diagnosed with breast cancer between three and 23 months after their last screening mammography and were interviewed from six to 36 months after diagnosis. Based on the women's reports during the interview, all had been surgically treated, either with mastectomy or with breast conserving surgery, 21 women had undergone radiation therapy, and 14 chemotherapy (Table 1). Few women knew whether their malignant tumor represented a false negative mammography scan or a true interval cancer. Some had asked for a review of previous images, but most did not mention the possibility of false negative screening when asked about their thoughts on having breast cancer between screening rounds.

Fourteen had contacted the health care services within a week after noticing a palpable lump (Table 2). Eight had waited between two weeks and three months before seeking medical advice, and two delayed more than three months. There were no differences in type of symptom between the immediate help-seekers and those waiting for weeks or months, as all talked about having a lump. Two women retrospectively reported symptoms such as mastalgia or breast contour change, but they had not related this to breast cancer before being diagnosed. In the following we will present the women's own explanations for their timing when seeking medical advice.

### Seeking medical advice immediately

Those who saw themselves as having sought medical advice promptly had all called their doctor's office or the mammography clinic at the first opportunity or at least within a week of feeling a lump.

*"I detected it at eleven p.m. And there I was, with a glowing phone at eight a.m. (Laughter) Next morning, straight to the GP." (Johanne, 56)*

The women who contacted their doctor immediately had no doubt about the possibility of having cancer. For them delay was no option after detecting a lump. In retrospect they had been certain that it could be a symptom of breast cancer. Thoughts about having cancer made acting upon it the rational option.



1  
2  
3 *"I was very quick to get to the GP. I was certain it was cancer right away. [...] I became very rational:*  
4 *Go to the clinic, make it go away."*(Vigdis, 62)  
5  
6  
7

### 8 **Postponing seeking medical advice**

9  
10 Ten of the women had waited between two weeks and six months before seeking medical advice.  
11 Some of the women reported that they reinterpreted embodied sensations as possible cancer  
12 symptoms in retrospect, after being diagnosed. Prior to feeling a lump, they had either not noticed  
13 these symptoms or at least not interpreted them as symptoms of cancer. Each woman gave several  
14 explanations for what she retrospectively saw as her delay in help-seeking.  
15  
16  
17  
18  
19

#### 20 *Uncertainty about symptom*

21  
22 All these women acknowledged that breast anomalies could often represent symptoms of breast  
23 cancer. However, their own bodily changes did not always stand out as definite symptoms. Being  
24 uncertain about the etiology of the breast change, it was initially interpreted as imaginary or  
25 something that could change back to normal.  
26  
27  
28  
29

30 *"No you can't date it because you just sense it and consider it, and eventually it grows, so*  
31 *it could maybe have been a month or so. [...] Yes, because it could potentially regress."*  
32 *(Cecilie, 67)*  
33  
34  
35

36 Olaug (63) and Eva (57) explained their lesions due to sore skin from a tight bra or to an inflammation  
37 of some kind, sensations and observations the women later reinterpreted as possible early  
38 symptoms of cancer. They delayed seeking medical advice as the symptoms appeared too vague, for  
39 instance having an unpleasant sensation in the breast, nausea or tiredness. Their initial  
40 interpretations of their bodily sensations were framed by everyday experiences, as mentioned  
41 above. In hindsight, these bodily experiences were acknowledged as breast cancer symptoms.  
42  
43  
44  
45  
46  
47

#### 48 *Previous experiences*

49  
50 Postponement of help seeking also occurred after a bodily sensation was identified as a potential  
51 symptom. Previous negative experiences with health care services contributed to reluctance towards  
52 seeking potentially unnecessary medical examinations. Those with multiple experiences with illness  
53 and disease were tired of being in the patient role. Prior negative encounters with health care  
54  
55  
56  
57  
58  
59  
60

1  
2  
3 services following diffuse symptoms resulted in a a threshold against seeking help with diffuse breast  
4 cancer symptoms.  
5

6  
7 *"I thought it might be an inflammation because I have had joint inflammations before and*  
8 *maybe that could have spread. And it was sore too. And one isn't too happy to go running*  
9 *to the doctor either. I did that all the time when I was younger, before I was diagnosed*  
10 *with arthritis, and with all that pain, so I'd rather not go (laughter). I got so tired when*  
11 *they never could detect what was wrong with me and I got all kinds of medications which*  
12 *damaged... [...] So I am glad when I feel healthy and don't have to go."* (Eva, 57)  
13  
14  
15  
16

17 Having had frequent visits to the GP made some uneasy about being seen as whimpering. This  
18 suggests that "be a whimperer" or seeking health care services unnecessary were incoherent with  
19 their identity. Rather than be perceived as hypochondriacs, they would delay help-seeking for  
20 uncertain symptoms.  
21  
22  
23

#### 24 25 26 *Practical reasons* 27

28 There were also practical reasons given for delaying seeking medical advice. Two women had already  
29 a scheduled appointment with their GP when they detected a lump. Both waited until the  
30 appointment before bringing the lump to the doctor's attention.  
31  
32  
33

34  
35  
36 *"I had an appointment with the GP a few weeks after, so I waited until then. It was*  
37 *probably nothing anyway."* (Gudrun, 60)  
38  
39  
40

41 Noticing a lump during holidays also led to a delay in seeing the doctor. Actions after finding a lump  
42 were not solely about the lesion, but also about their social situation. Practical reasons were  
43 intertwined with other explanations such as interpreting the mass as benign or non-existent.  
44  
45  
46

#### 47 48 49 *Mammography screening* 50

51 For some of the women the essential argument for delaying was related to having participated in  
52 mammography screening. Two different time frames were important for this argument. One was  
53 about having had a negative mammography in the recent past. The other was about an upcoming  
54 mammography. Having recently had a mammography scan led some to interpret the newly  
55 discovered lump as harmless. Having trusted mammography to detect even non-palpable lumps,  
56  
57  
58  
59  
60

1  
2  
3 some of the women experienced it as strange that cancer had not been found at the screening.  
4  
5 Petra, for instance, detected a lesion in April, but delayed acting upon it until October.  
6  
7

8  
9 *"I wonder if it [last mammography screening] wasn't in January that year. And that was*  
10 *probably the reason for my interpretation. Because I thought that when they hadn't seen*  
11 *anything then, it could not be anything now."* (Petra, 66)  
12  
13

14  
15  
16 Being part of a screening programme thus contributed to some women's interpretation of bodily  
17 signs as not being breast cancer symptoms. One woman presented a forward-looking argument for  
18 delaying. She had started to wait for a screening invitation, but after several months with a growing  
19 tumour she called the screening unit asking for the next screening appointment.  
20  
21  
22

23  
24  
25 *"I started to wait for the [mammography] bus that used to come, but it never came. Right?*  
26 *It was too long to wait, because I felt this... [...] Yes, because I'm usually called in. So I*  
27 *called the hospital and asked them when the bus was due, and they said that it would not*  
28 *come until later that year, and she asked me if there was something specific I had on my*  
29 *mind? So I told her I had pain in a breast, but that I knew it isn't any danger when it hurts.*  
30 *"Go see a doctor", she said. So I called my GP that day, and got an appointment the next*  
31 *day."* (Inger, 56)  
32  
33  
34  
35  
36  
37  
38

39  
40 Even when interpreting her lump as potential cancer, Inger delayed acting on it as she waited for the  
41 screening programme to act. Both women who had waited six months before seeking medical advice  
42 explained their delay with their screening participation. This suggests that some participants place  
43 too much trust in the cancer detection capabilities of the screening programme.  
44  
45  
46  
47  
48

## 49 **DISCUSSION**

50  
51 From this qualitative interview study we found that ten of 24 women who had been mammography  
52 screening participants put off seeking medical advice when detecting a palpable lump. True interval  
53 breast cancer has poorer survival compared to screen-detected cancers.<sup>6,8</sup> Delaying acting on a  
54 breast cancer symptom between screening rounds could potentially decrease survival. Medically  
55 defined, diagnostic delay is waiting more than three months with a symptom before help-seeking.  
56  
57  
58  
59  
60

1  
2  
3  
4  
5  
6  
7  
8  
9  
10  
11  
12  
13  
14  
15  
16  
17  
18  
19  
20  
21  
22  
23  
24  
25  
26  
27  
28  
29  
30  
31  
32  
33  
34  
35  
36  
37  
38  
39  
40  
41  
42  
43  
44  
45  
46  
47  
48  
49  
50  
51  
52  
53  
54  
55  
56  
57  
58  
59  
60

Though only two among these 26 women fell within this definition, eight further women who had not acted immediately considered themselves to have delayed the diagnosis. The four main reasons for waiting to seek medical advice were uncertainty about symptom interpretation, practical reasons, previous negative experiences, and being participants of mammography screening. In order to self-detect cancer, individuals must sense a symptom, acknowledge it as such, and take action to seek medical advice.<sup>23</sup> It has hitherto not been known whether participating in mammography screening could influence any of these processes. What was unique in the present study was that all study participants had been participants in a mammography screening programme, and we explored whether screening participation could have contributed to a diagnostic delay.

Symptom interpretation of breast cancer may cause patient delay.<sup>9;13-15;24;25</sup> Palpable lumps are a well-known symptom of breast cancer that should induce seeking medical advice. All women in a Dutch study associated lumps with breast cancer.<sup>9</sup> However, studies vary in their conclusions about whether having a palpable lesion is associated with more or less delay than non-palpable symptoms.<sup>17;26</sup> In the present study, all the women referred to lumps when asked what had led to seeking medical advice. Other symptoms known to represent breast cancer, such as retraction of the nipple or skin, nipple discharge, skin discolouring or change in texture, mastalgia, a palpable lump in the axilla or a changed breast contour, had only been recognized as breast cancer symptoms after having the cancer diagnosis. For these women, participation in mammography screening might have increased awareness about self-examination for lumps but had apparently not increased knowledge of other symptoms.

Delay in seeking medical advice cannot be explained solely by lack of knowledge.<sup>27</sup> All the women knew that a lump could be a sign of cancer, and yet some delayed seeking medical help. Patient delay can depend on the patient's interpretation of bodily signs as related to cancer.<sup>23</sup> Although they knew in general that a lump could be a sign of cancer, some of the women did not immediately make that connection in their own case. As found in earlier studies, they did not expect to be ill and their current situation provided alternative explanations for their bodily experiences.<sup>13</sup> The present study indicates that participating in mammography screening may provide other explanations for bodily signs, since cancer had not been detected by mammography. Retrospective interpretations of bodily sensations as symptoms of breast cancer suggest that some had been reluctant to trust their own bodily sensations. In this sense mammography may contribute to medicalization, leaving women to trust medical technology over their own bodily sensations. Another interpretation is that they were too frightened by the prospect of having cancer to react to potential symptoms, in which case screening participation was not so much a contributing factor to delay as it was an available excuse to avoid contemplating cancer.

1  
2  
3 Seeing previous or upcoming mammography screening as reasons for delaying seeking medical  
4 advice about potential breast cancer suggests that too much trust in a public screening programme  
5 may contribute to delayed diagnosis. Though only a few women expressed such arguments, our  
6 study demonstrates their existence in the population. Trusting previous screens to be correct may  
7 have led to non-cancer interpretations of symptoms. Waiting for the next screening round instead of  
8 acting upon a palpable lump indicates high trust in the correctness of a biennial design.  
9  
10  
11  
12

13  
14  
15 Delay has been an essential concept throughout breast cancer history in the US.<sup>12</sup> Cultural studies of  
16 breast cancer have been scarce in Norway, but media campaigns against delayed diagnosis have  
17 been implemented. These women's delayed actions must be understood within such a broader  
18 cultural context. Discourses depicting breast cancer as a continuum have dominated in recent  
19 decades, making women's breasts objects of constant surveillance both by themselves and by  
20 others.<sup>11</sup> With a lack of clearly identified measures of primary prevention, surveillance becomes the  
21 sole option for responsible health behaviour. Although ten women in the present study claimed  
22 having delayed help-seeking, only two women delayed more than three months. Those who saw  
23 themselves as having delayed their active response had varied and complex arguments explaining  
24 their (in)actions while women who sought medical help immediately were certain they were doing  
25 the right thing.  
26  
27  
28  
29  
30  
31  
32

33  
34 Although the design of our study does not tell about the magnitude of the delay problem, it clearly  
35 identifies a problem which deserves closer attention. In line with conclusions from other studies<sup>28-30</sup>,  
36 it also points in the direction of an upgrading of the importance of women's self-examinations and of  
37 further education regarding breast cancer symptoms.  
38  
39  
40  
41  
42

### 43 **Strengths and limitations**

44  
45 This qualitative interview study is unique in studying the experiences of women with interval cancer  
46 and how they related their experiences with breast cancer to mammography screening. Being  
47 interviewed about delaying seeking medical advice when detecting symptoms that later were  
48 diagnosed as cancer could be discomfoting for those feeling guilty about delaying, leading to  
49 answers masking guilt. A limitation to the current study is that it is based on women's retrospective  
50 reports. Some had been diagnosed up to three years prior to the interview. Experiences before  
51 having cancer may not be the most important to remember after going through intensive cancer  
52 treatment, and could have been reinterpreted several times since experiencing them.  
53  
54  
55  
56  
57  
58  
59  
60

1  
2  
3 Nearly 65 per cent of those invited to the study chose to participate. All women with interval cancer  
4 within a specific period in these communities were invited, but self-selection in responding to the  
5 invitation present a selection bias. It is a limitation to the study that we cannot compare those  
6 participating with the 14 non-respondents. Serious disease might have hindered participation.  
7  
8 Despite their cancer diagnosis, only six of the 26 respondents were fully retired. In Norway, less than  
9  
10 50 per cent of the population aged 55-74 were employed in 2005<sup>31</sup>, which indicates that participants  
11 in the present study could have been more resourceful than women in average. If diagnostic delay is  
12 a problem among the more resourceful segments of the population, it is reasonable to think that it is  
13 also present in the population in general.  
14  
15  
16  
17  
18  
19

20 We could expect potential cancer symptoms to be common in the population, as approximately 15  
21 per cent of the population at any time experience such symptoms.<sup>25</sup> Women with symptoms in-  
22 between screening rounds could be classified in three groups: women who receive an interval cancer  
23 diagnosis, women whose symptoms are diagnosed as benign, and women who delayed seeking  
24 medical advice until their next screening round. As only the first group were subjects of this study,  
25 more research on symptom interpretation among screening participants is warranted.  
26  
27  
28  
29

### 30 **Implications**

31  
32 Confidence in mammography programmes influences the interpretation of breast cancer symptoms.  
33 Awareness of symptoms other than lumps must be improved. Though information leaflets provide  
34 information about interval breast cancer, screening participants might not read leaflets thoroughly.  
35 Additional information and reminders during mammography examinations could be one solution.  
36  
37 Previous experiences of vague symptoms being set aside could lead women to neglect their own  
38 bodily sensations and prefer technology to give answers to their health status. In this qualitative  
39 study we have explored the women's own interpretation of help-seeking for interval breast cancer.  
40 Further studies are required as to whether their choice of actions have delayed diagnosis in medical  
41 terms, according to tumor characteristics and survival.  
42  
43  
44  
45  
46  
47  
48  
49

### 50 **References**

- 51  
52  
53 (1) Tornberg S, Kemetli L, Ascunce N, Hofvind S, Anttila A, Seradour B et al. A pooled analysis of  
54 interval cancer rates in six European countries. *European Journal of Cancer Prevention* 2010;  
55 19(2):87-93.  
56  
57  
58  
59  
60

- 1  
2  
3 (2) Zackrisson S, Janzon L, Manjer J, Andersson I. Improved survival rate for women with interval  
4 breast cancer - results from the breast cancer screening programme in Malmo, Sweden  
5 1976-1999. *Journal of Medical Screening* 2007; 14(3):138-143.  
6
- 7 (3) Brekelmans CT, Peeters PH, Deurenberg JJ, Collette HJ. Survival in interval breast cancer in  
8 the DOM screening programme. *Eur J Cancer* 1995; 31A(11):1830-1835.  
9
- 10 (4) Schroen AA, Wobbles T, van der Sluis RF. Interval carcinomas of the breast: a group with  
11 intermediate outcome. *J Surg Oncol* 1996; 63(3):141-144.  
12
- 13 (5) Bordas P, Jonsson H, Nystrom L, Lenner P. Survival from invasive breast cancer among  
14 interval cases in the mammography screening programmes of northern Sweden. *Breast*  
15 2007; 16(1):47-54.  
16
- 17 (6) Rayson D, Payne JI, Abdoell M, Barnes PJ, MacIntosh RF, Foley T et al. Comparison of clinical-  
18 pathologic characteristics and outcomes of true interval and screen-detected invasive breast  
19 cancer among participants of a Canadian breast screening program: a nested case-control  
20 study. *Clin Breast Cancer* 2011; 11(1):27-32.  
21
- 22 (7) Kirsh VA, Chiarelli AM, Edwards SA, O'Malley FP, Shumak RS, Yaffe MJ et al. Tumor  
23 characteristics associated with mammographic detection of breast cancer in the Ontario  
24 breast screening program. *J Natl Cancer Inst* 2011; 103(12):942-950.  
25
- 26 (8) Wegwarth O, Schwartz LM, Woloshin S, Gaissmaier W, Gigerenzer G. Do physicians  
27 understand cancer screening statistics? A national survey of primary care physicians in the  
28 United States. *Ann Intern Med* 2012; 156(5):340-349.  
29
- 30 (9) De Nooijer J, Lechner L, De Vries H. A qualitative study on detecting cancer symptoms and  
31 seeking medical help; an application of Andersen's model of total patient delay. *Patient*  
32 *Education and Counseling* 2001; 42(2):145-157.  
33
- 34 (10) Lerner BH. The breast cancer wars. Hope, fear, and the pursuit of a cure in twentieth-century  
35 America. Oxford: Oxford University Press; 2001.  
36
- 37 (11) Klawiter M. The biopolitics of breast cancer. Changing cultures of disease and activism.  
38 Minneapolis: University of Minnesota Press; 2008.  
39
- 40 (12) Aronowitz RA. Do not delay: Breast cancer and time, 1900-1970. *Milbank Quarterly* 2001;  
41 79(3):355-386.  
42
- 43 (13) Andersen RS, Paarup B, Vedsted P, Bro F, Soendergaard J. 'Containment' as an analytical  
44 framework for understanding patient delay: a qualitative study of cancer patients' symptom  
45 interpretation processes. *Soc Sci Med* 2010; 71(2):378-385.  
46
- 47 (14) Sun Y, Knobf T. Concept Analysis of Symptom Disclosure in the Context of Cancer. *Advances*  
48 *in Nursing Science* 2008; 31(4):332-341.  
49
- 50 (15) Andersen BL, Cacioppo JT. Delay in seeking a cancer diagnosis: delay stages and  
51 psychophysiological comparison processes. *Br J Soc Psychol* 1995; 34 ( Pt 1):33-52.  
52
- 53 (16) Ristvedt SL, Trinkaus KM. Psychological factors related to delay in consultation for cancer  
54 symptoms. *Psychooncology* 2005; 14(5):339-350.  
55  
56  
57  
58  
59  
60

- 1  
2  
3 (17) Facione NC, Facione PA. The cognitive structuring of patient delay in breast cancer. *Social*  
4 *Science & Medicine* 2006; 63(12):3137-3149.  
5  
6 (18) De Nooijer J, Lechner L, De Vries H. Social psychological correlates of paying attention to  
7 cancer symptoms and seeking medical help. *Soc Sci Med* 2003; 56(5):915-920.  
8  
9 (19) de GR, van AE, Tilanus-Linthorst MM, Bartels CC, Boer R, Draisma G et al. Breast cancer  
10 screening: evidence for false reassurance? *Int J Cancer* 2008; 123(3):680-686.  
11  
12 (20) Solbjør M. "You Have to Have Trust in Those Pictures." A Perspective on Women's  
13 Experiences of Mammography Screening. In: Brownlie J, Greene A, Howson A, editors.  
14 Researching Trust and Health. London: Routledge; 2008.  
15  
16 (21) Coffey A, Atkinson P. Making sense of qualitative data. Complementary research strategies.  
17 Thousand Oaks: Sage Publications; 1996.  
18  
19 (22) Kvale S, Brinkmann S. Interviews. An introduction to qualitative research interviewing. 2 ed.  
20 London: Sage; 2008.  
21  
22 (23) Andersen RS, Vedsted P, Olesen F, Bro F, Sondergaard J. Patient delay in cancer studies: a  
23 discussion of methods and measures. *BMC Health Serv Res* 2009; 9:189.  
24  
25 (24) Simon AE, Waller J, Robb K, Wardle J. Patient delay in presentation of possible cancer  
26 symptoms: the contribution of knowledge and attitudes in a population sample from the  
27 United kingdom. *Cancer Epidemiol Biomarkers Prev* 2010; 19(9):2272-2277.  
28  
29 (25) Rauscher GH, Ferrans CE, Kaiser K, Campbell RT, Calhoun EE, Warnecke RB. Misconceptions  
30 about breast lumps and delayed medical presentation in urban breast cancer patients.  
31 *Cancer Epidemiol Biomarkers Prev* 2010; 19(3):640-647.  
32  
33 (26) Macleod U, Mitchell ED, Burgess C, Macdonald S, Ramirez AJ. Risk factors for delayed  
34 presentation and referral of symptomatic cancer: evidence for common cancers. *Br J Cancer*  
35 2009; 101 Suppl 2:S92-S101.  
36  
37 (27) De Nooijer J, Lechner L, De Vries H. Help-seeking behaviour for cancer symptoms:  
38 Perceptions of patients and general practitioners. *Psycho-Oncology* 2001; 10(6):469-478.  
39  
40 (28) Carney PA, Steiner E, Goodrich ME, Dietrich AJ, Kasales CJ, Weiss JE et al. Discovery of breast  
41 cancers within 1 year of a normal screening mammogram: how are they found? *Ann Fam*  
42 *Med* 2006; 4(6):512-518.  
43  
44 (29) Haakinson DJ, Stucky CC, Dueck AC, Gray RJ, Wasif N, Apsey HA et al. A significant number of  
45 women present with palpable breast cancer even with a normal mammogram within 1 year.  
46 *Am J Surg* 2010; 200(6):712-717.  
47  
48 (30) Ma I, Dueck A, Gray R, Wasif N, Giurescu M, Lorans R et al. Clinical and self breast  
49 examination remain important in the era of modern screening. *Ann Surg Oncol* 2012;  
50 19(5):1484-1490.  
51  
52 (31) Villund O. Pensjoneringsalder - begreper, data, metoder. [73]. 2006. Statistics Norway. 25-8-  
53 2012. Online Source  
54  
55  
56  
57  
58  
59  
60



Table 1 Description of treatment for breast cancer, self-reported.

| Treatment  | Surgery    | Surgery + radiation | Surgery + chemotherapy | Surgery + radiation + chemotherapy |                   |
|------------|------------|---------------------|------------------------|------------------------------------|-------------------|
| <b>Age</b> |            |                     |                        |                                    |                   |
| 50-54      | 0          | 0                   | 0                      | 3                                  |                   |
| 55-59      | 2          | 3                   | 0                      | 6                                  |                   |
| 60-64      | 0          | 4                   | 0                      | 4                                  |                   |
| 65-69      | 2          | 1                   | 1                      | 0                                  |                   |
| <b>Sum</b> | 4 (15,4 %) | 8 (30,8 %)          | 1 (3,8 %)              | 13 (50,0 %)                        | <b>Total N=26</b> |

Table 2 Description of women who participated in study: age and help-seeking behaviour

| Reaction time | Detected though other medical examinations | 1-2 days           | Within 2 weeks    | Less than 2 months | Approx 6 months  |                   |
|---------------|--------------------------------------------|--------------------|-------------------|--------------------|------------------|-------------------|
| <b>Age</b>    |                                            |                    |                   |                    |                  | Mean=59.4         |
| 50-54         | 0                                          | 2                  | 0                 | 1                  | 0                | 3 (11,5 %)        |
| 55-59         | 1                                          | 5                  | 3                 | 1                  | 1                | 11 (42,3 %)       |
| 60-64         | 0                                          | 3                  | 3                 | 2                  | 0                | 8 (30,8 %)        |
| 65-69         | 1                                          | 1                  | 0                 | 1                  | 1                | 4 (15,4 %)        |
| <b>Sum</b>    | <b>2 (7,7 %)</b>                           | <b>11 (42,3 %)</b> | <b>6 (23,0 %)</b> | <b>5 (19,2 %)</b>  | <b>2 (7,7 %)</b> | <b>Total N=26</b> |

1  
2  
3  
4  
5  
6  
7  
8  
9  
10  
11  
12  
13  
14  
15  
16  
17  
18  
19  
20  
21  
22  
23  
24  
25  
26  
27  
28  
29  
30  
31  
32  
33  
34  
35  
36  
37  
38  
39  
40  
41  
42  
43  
44  
45  
46  
47  
48  
49  
50  
51  
52  
53  
54  
55  
56  
57  
58  
59  
60

For peer review only

## Title page

**Title:** Could screening participation bias symptom interpretation? An interview study on women's interpretations of and responses to cancer symptoms between mammography screening rounds.

**Authors:**

Solbjør, Marit; Post.doc-fellow, Norwegian University of Science and Technology, Medical Faculty, Department of Public Health and General Practice, Postbox 8905, MTFS, 7491 Trondheim.

Skolbekken, John-Arne; Associate Professor, Norwegian University of Science and Technology, Department of Social Work and Health Science, 7491 Trondheim.

Sætnan, Ann Rudinow; Professor, Norwegian University of Science and Technology, Department of Sociology and Political Science, 7491 Trondheim.

Hagen, Anne Irene; Researcher/Senior Consultant, Department of Breast and Endocrine Surgery, Trondheim University Hospital, Trondheim, Norway

Forsmo, Siri; Professor, Norwegian University of Science and Technology, Medical Faculty, Department of Public Health and General Practice, Postbox 8905, MTFS, 7491 Trondheim.

**E-mail corresponding author:** [Marit.Solbjor@ntnu.no](mailto:Marit.Solbjor@ntnu.no)

Phone: +47 73598905, Fax: +47 73597577

**Authorship-contributorship statement:** MS, SF and JAS planned and designed the study. AIH contributed with recruitment together with MS. MS conducted the interviews. All authors contributed to the analysis of data and in writing the article. All authors agree on the submission of the present manuscript. MS is responsible for the overall content as guarantor.

**Ethics approval:** The study was approved by the Regional committee for medical research ethics (REK midt) and informed consent was given by all participants.

**Funding:** The study was financed by the Norwegian Research Council (NFR) through the research-based evaluation of the Norwegian Breast Cancer Screening Programme. NFR had no involvement in the research process or writing of this article.

1  
2  
3 **Acknowledgement:** The breast diagnostic units at Nordland Hospital and Trondheim University  
4 Hospital provided valuable help with recruitment.  
5  
6

7  
8  
9 Number of words: 3379

10  
11 Number of tables: 2

12  
13 Running head: Could screening participation bias symptom interpretation?  
14

15  
16  
17 **Article summary:**

18  
19  
20 **Article Focus**

- 21  
22
  - Interval breast cancer comprises 28 per cent of cancers among screened women in Europe.
  - Women who participate in mammography screening may delay acting upon breast cancer symptoms if they trust screening results to be correct.
  - We asked women with interval breast cancer how they had reacted to detecting symptoms of breast cancer in-between screening rounds.

23  
24  
25  
26  
27  
28  
29  
30  
31  
32

33  
34 **Key Messages**

- 35  
36
  - Despite the last mammography screening being negative, most of the interviewed women interpreted lumps as breast cancer symptoms and sought medical advice rapidly. Some women defined themselves as delayers despite seeking medical advice less than three months after symptom presentation.
  - Only a few women who detected symptoms of breast cancer in-between screening rounds delayed seeking medical advice due to a recent negative screening result in the mammography screening programme.
  - Other symptoms than lumps were only acknowledged as cancer symptoms in retrospect. Screening seems a missed opportunity to inform women better about breast cancer symptoms.

37  
38  
39  
40  
41  
42  
43  
44  
45  
46  
47  
48  
49  
50  
51  
52  
53  
54

55  
56 **Strengths and limitations**  
57  
58  
59  
60

1  
2  
3 This qualitative interview study is unique in studying the experiences of women with interval cancer  
4 and how they related their experiences with breast cancer to mammography screening. A limitation  
5 to the current study is that it is based on women's retrospective reports. Self-selection in responding  
6 to the invitation present a selection bias; women with advanced cancer might not have participated  
7 in the study, and participants may have been more resourceful than average.  
8  
9  
10  
11  
12  
13  
14  
15  
16  
17  
18  
19  
20  
21  
22  
23  
24  
25  
26  
27  
28  
29  
30  
31  
32  
33  
34  
35  
36  
37  
38  
39  
40  
41  
42  
43  
44  
45  
46  
47  
48  
49  
50  
51  
52  
53  
54  
55  
56  
57  
58  
59  
60

## ABSTRACT

**Objectives** To explore how women with negative mammography screening results, but who were later diagnosed with interval breast cancer, reacted when they observed breast symptoms that could indicate malignancy in-between screening rounds.

**Design** Semi-structured individual interviews with women who have been diagnosed with breast cancer during mammography screening intervals.

**Setting** Two breast diagnostic units covering two counties in Norway.

**Participants** 26 women diagnosed with interval breast cancer.

**Results** Women with a screening negative result react in two ways when experiencing a possible symptom of breast cancer. Among 24 women with a self-detected palpable lesion, 14 sought medical advice immediately. Their argument was to dispose of potential cancer as soon as possible. Ten women delayed seeking medical advice, explaining their delay as a result of practical difficulties such as holidays, uncertainty about the symptom, and previous experiences of health care services' ability to handle diffuse symptoms. Also, a recent negative mammography scan led some women to assume that the palpable lesion was benign and wait for the next screening round.

**Conclusion** Participating in mammography screening may contribute to a postponed reaction to breast cancer symptoms, although most women acted rapidly when detecting a palpable breast lesion. Furthermore, screening participation does not necessarily increase awareness of breast cancer symptoms.

**Keywords:** Breast cancer, interval cancer, oncology, mammography, screening.

## INTRODUCTION

Mammography screening aims to provide a pre-symptomatic diagnosis of breast cancer. Nevertheless, interval cancer, which is cancer detected between screening rounds, comprises 28 per cent of cancers among screened women in Europe.<sup>1</sup> Survival rates for interval cancers have improved during recent decades<sup>2</sup>, and it is controversial whether true interval cancers have less favourable prognosis than screening detected cancers or breast cancers diagnosed outside a screening programme.<sup>3-5</sup> Rayson et al found poorer survival in true interval breast cancer compared to screen-detected cancers. The findings of adverse prognostic factors like higher grade and stage, receptor negativity and high mitotic index in true interval cancers might contribute to poorer survival outcome.<sup>6,7</sup> **On the other side, survival rates in the screen detected groups are biased (lead and length time bias and overdiagnosis), leading to misinterpretation of the true effectiveness of screening.**<sup>8</sup> It should not be excluded, however, that diagnostic delay due to a recent negative mammogram may be an important factor in poorer survival rates.

Diagnostic delay occurs at many stages of the cancer detection process.<sup>9</sup> We will here concentrate on screening participants interpretation of bodily changes, and their help-seeking. Early detection of breast cancer has been promoted throughout the 20<sup>th</sup> century, including women's responsibility to react upon a palpable breast lesion.<sup>10-12</sup> Nevertheless, recognition of a breast cancer symptom is not always a straightforward process. Cultural contexts influence symptom experiences and bodily signs become symptoms only after an interpretation that they are abnormal.<sup>9,13,14</sup> The process from the onset of bodily changes until recognition of a symptom may be the period of time accounting for the greatest proportion of patient delay.<sup>15,16</sup> But even then, interpreting symptoms as cancer does not automatically lead to taking action.<sup>14,17,18</sup>

An argument for mammography screening is that it leads to earlier breast cancer detection compared with women's self-detection. The positive effect mammography may have on the time of detection must, however, be balanced against whether patient delay could be induced by the reassurance given following a negative screening.<sup>19</sup> A previous qualitative study indicates that women trust mammography screening to provide true results about their breast status.<sup>20</sup> The question addressed in this article is whether screening participation interferes with the women's symptom interpretation and help seeking. This study explores how women with negative mammography screening results who were later diagnosed with interval breast cancer, reacted when they observed breast symptoms that could indicate malignancy in-between screening rounds.

## **METHODS**

This was a qualitative interview study with women who had experienced interval breast cancer within the Norwegian breast cancer screening programme. This is a nationwide, public screening programme that offers mammography biennially for all women aged 50-69. The study was approved by the Regional Committee for Medical Research; participation was based on written consent.

### **Recruitment**

Forty women diagnosed with interval cancer at two hospitals in Central and Northern Norway were invited to the study. During the years 2006-2009, 178 interval breast cancers were diagnosed at these two hospitals. Due to long distances and the low population density in rural Norway, all invited to the study lived in or near urban or semi-urban areas. In order to have the women's stories as close to the event as possible, they were the twenty women last diagnosed with interval breast cancer at each hospital, living in or nearby one of four cities (inhabitants 9,500-150,000), counting back from six months before the study invitation was sent. A total of 26 women accepted the invitation. Due to confidentiality regulations, we have no access to information about the 14 women who did not respond to the invitation.

### **The interviews**

Semi-structured interviews were carried out in 2009 by the first author (MS), at a hospital, a university, a hotel meeting room, or in the woman's home or workplace if requested. Following a semi-structured interview guide, the women were invited to tell their breast cancer story, including what kind of breast cancer symptoms they had reacted to. Other questions were about their views on mammography screening and reactions upon having interval breast cancer. Each interview lasted 45 to 60 minutes, and was audiotaped prior to being transcribed in verbatim. All informants have been given fictitious names to secure anonymity.

### **Analysis**

Two researchers read all the interviews independently, and all co-authors read some of the interviews. We used a method of constant comparison, comparing themes within and between interviews. All authors discussed themes arising from the interviews. We conducted thematic analysis.<sup>21</sup> Data were categorized using NVivo 8.0. Within each theme we found sub-themes which were subjected to meaning interpretation.<sup>22</sup>



## RESULTS

### Participants

The 26 participating women were aged 53 to 69 years, in average 59.4. Twenty-four had discovered the symptoms of breast cancer themselves; two were detected during other medical examinations. The women were diagnosed with breast cancer between three and 23 months after their last screening mammography and were interviewed from six to 36 months after diagnosis. Based on the women's reports during the interview, all had been surgically treated, either with mastectomy or with breast conserving surgery, 21 women had undergone radiation therapy, and 14 chemotherapy (Table 1). Few women knew whether their malignant tumor represented a false negative mammography scan or a true interval cancer. Some had asked for a review of previous images, but most did not mention the possibility of false negative screening when asked about their thoughts on having breast cancer between screening rounds.

Fourteen had contacted the health care services within a week after noticing a palpable lump (Table 2). Eight had waited between two weeks and three months before seeking medical advice, and two delayed more than three months. There were no differences in type of symptom between the immediate help-seekers and those waiting for weeks or months, as all talked about having a lump. Two women retrospectively reported symptoms such as mastalgia or breast contour change, but they had not related this to breast cancer before being diagnosed. In the following we will present the women's own explanations for their timing when seeking medical advice.

### Seeking medical advice immediately

Those who saw themselves as having sought medical advice promptly had all called their doctor's office or the mammography clinic at the first opportunity or at least within a week of feeling a lump.

*"I detected it at eleven p.m. And there I was, with a glowing phone at eight a.m. (Laughter) Next morning, straight to the GP." (Johanne, 56)*

The women who contacted their doctor immediately had no doubt about the possibility of having cancer. For them delay was no option after detecting a lump. In retrospect they had been certain that it could be a symptom of breast cancer. Thoughts about having cancer made acting upon it the rational option.

1  
2  
3 *"I was very quick to get to the GP. I was certain it was cancer right away. [...] I became very rational:*  
4 *Go to the clinic, make it go away."*(Vigdis, 62)  
5  
6  
7

### 8 **Postponing seeking medical advice**

9  
10 Ten of the women had waited between two weeks and six months before seeking medical advice.  
11 Some of the women reported that they reinterpreted embodied sensations as possible cancer  
12 symptoms in retrospect, after being diagnosed. Prior to feeling a lump, they had either not noticed  
13 these symptoms or at least not interpreted them as symptoms of cancer. Each woman gave several  
14 explanations for what she retrospectively saw as her delay in help-seeking.  
15  
16  
17  
18  
19

#### 20 *Uncertainty about symptom*

21  
22 All these women acknowledged that breast anomalies could often represent symptoms of breast  
23 cancer. However, their own bodily changes did not always stand out as definite symptoms. Being  
24 uncertain about the etiology of the breast change, it was initially interpreted as imaginary or  
25 something that could change back to normal.  
26  
27  
28  
29

30 *"No you can't date it because you just sense it and consider it, and eventually it grows, so*  
31 *it could maybe have been a month or so. [...] Yes, because it could potentially regress."*  
32 *(Cecilie, 67)*  
33  
34  
35

36 Olaug (63) and Eva (57) explained their lesions due to sore skin from a tight bra or to an inflammation  
37 of some kind, sensations and observations the women later reinterpreted as possible early  
38 symptoms of cancer. They delayed seeking medical advice as the symptoms appeared too vague, for  
39 instance having an unpleasant sensation in the breast, nausea or tiredness. Their initial  
40 interpretations of their bodily sensations were framed by everyday experiences, as mentioned  
41 above. In hindsight, these bodily experiences were acknowledged as breast cancer symptoms.  
42  
43  
44  
45  
46  
47

#### 48 *Previous experiences*

49  
50 Postponement of help seeking also occurred after a bodily sensation was identified as a potential  
51 symptom. Previous negative experiences with health care services contributed to reluctance towards  
52 seeking potentially unnecessary medical examinations. Those with multiple experiences with illness  
53 and disease were tired of being in the patient role. Prior negative encounters with health care  
54  
55  
56  
57  
58  
59  
60

1  
2  
3 services following diffuse symptoms resulted in a a threshold against seeking help with diffuse breast  
4 cancer symptoms.  
5

6  
7 *"I thought it might be an inflammation because I have had joint inflammations before and*  
8 *maybe that could have spread. And it was sore too. And one isn't too happy to go running*  
9 *to the doctor either. I did that all the time when I was younger, before I was diagnosed*  
10 *with arthritis, and with all that pain, so I'd rather not go (laughter). I got so tired when*  
11 *they never could detect what was wrong with me and I got all kinds of medications which*  
12 *damaged... [...] So I am glad when I feel healthy and don't have to go."* (Eva, 57)  
13  
14  
15  
16

17 Having had frequent visits to the GP made some uneasy about being seen as whimpering. This  
18 suggests that "be a whimperer" or seeking health care services unnecessary were incoherent with  
19 their identity. Rather than be perceived as hypochondriacs, they would delay help-seeking for  
20 uncertain symptoms.  
21  
22  
23

#### 24 25 26 *Practical reasons*

27  
28 There were also practical reasons given for delaying seeking medical advice. Two women had already  
29 a scheduled appointment with their GP when they detected a lump. Both waited until the  
30 appointment before bringing the lump to the doctor's attention.  
31  
32  
33

34  
35  
36 *"I had an appointment with the GP a few weeks after, so I waited until then. It was*  
37 *probably nothing anyway."* (Gudrun, 60)  
38  
39  
40

41 Noticing a lump during holidays also led to a delay in seeing the doctor. Actions after finding a lump  
42 were not solely about the lesion, but also about their social situation. Practical reasons were  
43 intertwined with other explanations such as interpreting the mass as benign or non-existent.  
44  
45  
46

#### 47 48 49 *Mammography screening*

50  
51 For some of the women the essential argument for delaying was related to having participated in  
52 mammography screening. Two different time frames were important for this argument. One was  
53 about having had a negative mammography in the recent past. The other was about an upcoming  
54 mammography. Having recently had a mammography scan led some to interpret the newly  
55 discovered lump as harmless. Having trusted mammography to detect even non-palpable lumps,  
56  
57  
58  
59  
60

1  
2  
3 some of the women experienced it as strange that cancer had not been found at the screening.  
4  
5 Petra, for instance, detected a lesion in April, but delayed acting upon it until October.  
6  
7

8  
9 *"I wonder if it [last mammography screening] wasn't in January that year. And that was*  
10 *probably the reason for my interpretation. Because I thought that when they hadn't seen*  
11 *anything then, it could not be anything now."* (Petra, 66)  
12  
13

14  
15  
16 Being part of a screening programme thus contributed to some women's interpretation of bodily  
17 signs as not being breast cancer symptoms. One woman presented a forward-looking argument for  
18 delaying. She had started to wait for a screening invitation, but after several months with a growing  
19 tumour she called the screening unit asking for the next screening appointment.  
20  
21  
22

23  
24  
25 *"I started to wait for the [mammography] bus that used to come, but it never came. Right?*  
26 *It was too long to wait, because I felt this... [...] Yes, because I'm usually called in. So I*  
27 *called the hospital and asked them when the bus was due, and they said that it would not*  
28 *come until later that year, and she asked me if there was something specific I had on my*  
29 *mind? So I told her I had pain in a breast, but that I knew it isn't any danger when it hurts.*  
30 *"Go see a doctor", she said. So I called my GP that day, and got an appointment the next*  
31 *day."* (Inger, 56)  
32  
33  
34  
35  
36  
37  
38

39  
40 Even when interpreting her lump as potential cancer, Inger delayed acting on it as she waited for the  
41 screening programme to act. Both women who had waited six months before seeking medical advice  
42 explained their delay with their screening participation. This suggests that some participants place  
43 too much trust in the cancer detection capabilities of the screening programme.  
44  
45  
46  
47  
48

## 49 **DISCUSSION**

50  
51 From this qualitative interview study we found that ten of 24 women who had been mammography  
52 screening participants put off seeking medical advice when detecting a palpable lump. **True interval**  
53 **breast cancer has poorer survival compared to screen-detected cancers.** <sup>6,8</sup> Delaying acting on a  
54 breast cancer symptom between screening rounds could potentially decrease survival. Medically  
55 defined, diagnostic delay is waiting more than three months with a symptom before help-seeking.  
56  
57  
58  
59  
60

1  
2  
3  
4  
5  
6  
7  
8  
9  
10  
11  
12  
13  
14  
15  
16  
17  
18  
19  
20  
21  
22  
23  
24  
25  
26  
27  
28  
29  
30  
31  
32  
33  
34  
35  
36  
37  
38  
39  
40  
41  
42  
43  
44  
45  
46  
47  
48  
49  
50  
51  
52  
53  
54  
55  
56  
57  
58  
59  
60

Though only two among these 26 women fell within this definition, eight further women who had not acted immediately considered themselves to have delayed the diagnosis. The four main reasons for waiting to seek medical advice were uncertainty about symptom interpretation, practical reasons, previous negative experiences, and being participants of mammography screening. In order to self-detect cancer, individuals must sense a symptom, acknowledge it as such, and take action to seek medical advice.<sup>23</sup> It has hitherto not been known whether participating in mammography screening could influence any of these processes. What was unique in the present study was that all study participants had been participants in a mammography screening programme, and we explored whether screening participation could have contributed to a diagnostic delay.

Symptom interpretation of breast cancer may cause patient delay.<sup>9;13-15;24;25</sup> Palpable lumps are a well-known symptom of breast cancer that should induce seeking medical advice. All women in a Dutch study associated lumps with breast cancer.<sup>9</sup> However, studies vary in their conclusions about whether having a palpable lesion is associated with more or less delay than non-palpable symptoms.<sup>17;26</sup> In the present study, all the women referred to lumps when asked what had led to seeking medical advice. Other symptoms known to represent breast cancer, such as retraction of the nipple or skin, nipple discharge, skin discolouring or change in texture, mastalgia, a palpable lump in the axilla or a changed breast contour, had only been recognized as breast cancer symptoms after having the cancer diagnosis. For these women, participation in mammography screening might have increased awareness about self-examination for lumps but had apparently not increased knowledge of other symptoms.

Delay in seeking medical advice cannot be explained solely by lack of knowledge.<sup>27</sup> All the women knew that a lump could be a sign of cancer, and yet some delayed seeking medical help. Patient delay can depend on the patient's interpretation of bodily signs as related to cancer.<sup>23</sup> Although they knew in general that a lump could be a sign of cancer, some of the women did not immediately make that connection in their own case. As found in earlier studies, they did not expect to be ill and their current situation provided alternative explanations for their bodily experiences.<sup>13</sup> The present study indicates that participating in mammography screening may provide other explanations for bodily signs, since cancer had not been detected by mammography. Retrospective interpretations of bodily sensations as symptoms of breast cancer suggest that some had been reluctant to trust their own bodily sensations. In this sense mammography may contribute to medicalization, leaving women to trust medical technology over their own bodily sensations. Another interpretation is that they were too frightened by the prospect of having cancer to react to potential symptoms, in which case screening participation was not so much a contributing factor to delay as it was an available excuse to avoid contemplating cancer.

1  
2  
3 Seeing previous or upcoming mammography screening as reasons for delaying seeking medical  
4 advice about potential breast cancer suggests that too much trust in a public screening programme  
5 may contribute to delayed diagnosis. Though only a few women expressed such arguments, our  
6 study demonstrates their existence in the population. Trusting previous screens to be correct may  
7 have led to non-cancer interpretations of symptoms. Waiting for the next screening round instead of  
8 acting upon a palpable lump indicates high trust in the correctness of a biennial design.  
9  
10  
11  
12

13  
14  
15 Delay has been an essential concept throughout breast cancer history in the US.<sup>12</sup> Cultural studies of  
16 breast cancer have been scarce in Norway, but media campaigns against delayed diagnosis have  
17 been implemented. These women's delayed actions must be understood within such a broader  
18 cultural context. Discourses depicting breast cancer as a continuum have dominated in recent  
19 decades, making women's breasts objects of constant surveillance both by themselves and by  
20 others.<sup>11</sup> With a lack of clearly identified measures of primary prevention, surveillance becomes the  
21 sole option for responsible health behaviour. Although ten women in the present study claimed  
22 having delayed help-seeking, only two women delayed more than three months. Those who saw  
23 themselves as having delayed their active response had varied and complex arguments explaining  
24 their (in)actions while women who sought medical help immediately were certain they were doing  
25 the right thing.  
26  
27  
28  
29  
30  
31  
32

33  
34 Although the design of our study does not tell about the magnitude of the delay problem, it clearly  
35 identifies a problem which deserves closer attention. In line with conclusions from other studies<sup>28-30</sup>,  
36 it also points in the direction of an upgrading of the importance of women's self-examinations and of  
37 further education regarding breast cancer symptoms.  
38  
39  
40  
41  
42

### 43 **Strengths and limitations**

44  
45 This qualitative interview study is unique in studying the experiences of women with interval cancer  
46 and how they related their experiences with breast cancer to mammography screening. Being  
47 interviewed about delaying seeking medical advice when detecting symptoms that later were  
48 diagnosed as cancer could be discomfoting for those feeling guilty about delaying, leading to  
49 answers masking guilt. A limitation to the current study is that it is based on women's retrospective  
50 reports. Some had been diagnosed up to three years prior to the interview. Experiences before  
51 having cancer may not be the most important to remember after going through intensive cancer  
52 treatment, and could have been reinterpreted several times since experiencing them.  
53  
54  
55  
56  
57  
58  
59  
60

1  
2  
3 Nearly 65 per cent of those invited to the study chose to participate. All women with interval cancer  
4 within a specific period in these communities were invited, but self-selection in responding to the  
5 invitation present a selection bias. It is a limitation to the study that we cannot compare those  
6 participating with the 14 non-respondents. Serious disease might have hindered participation.  
7  
8 Despite their cancer diagnosis, only six of the 26 respondents were fully retired. In Norway, less than  
9 50 per cent of the population aged 55-74 were employed in 2005<sup>31</sup>, which indicates that participants  
10 in the present study could have been more resourceful than women in average. If diagnostic delay is  
11 a problem among the more resourceful segments of the population, it is reasonable to think that it is  
12 also present in the population in general.  
13  
14  
15  
16  
17  
18  
19

20 We could expect potential cancer symptoms to be common in the population, as approximately 15  
21 per cent of the population at any time experience such symptoms.<sup>25</sup> Women with symptoms in-  
22 between screening rounds could be classified in three groups: women who receive an interval cancer  
23 diagnosis, women whose symptoms are diagnosed as benign, and women who delayed seeking  
24 medical advice until their next screening round. As only the first group were subjects of this study,  
25 more research on symptom interpretation among screening participants is warranted.  
26  
27  
28  
29

### 30 **Implications**

31  
32 Confidence in mammography programmes influences the interpretation of breast cancer symptoms.  
33 Awareness of symptoms other than lumps must be improved. Though information leaflets provide  
34 information about interval breast cancer, screening participants might not read leaflets thoroughly.  
35 Additional information and reminders during mammography examinations could be one solution.  
36  
37 Previous experiences of vague symptoms being set aside could lead women to neglect their own  
38 bodily sensations and prefer technology to give answers to their health status. In this qualitative  
39 study we have explored the women's own interpretation of help-seeking for interval breast cancer.  
40 Further studies are required as to whether their choice of actions have delayed diagnosis in medical  
41 terms, according to tumor characteristics and survival.  
42  
43  
44  
45  
46  
47  
48  
49

### 50 **References**

- 51  
52 (1) Tornberg S, Kemetli L, Ascunce N, Hofvind S, Anttila A, Seradour B et al. A pooled analysis of  
53 interval cancer rates in six European countries. *European Journal of Cancer Prevention* 2010;  
54 19(2):87-93.  
55  
56  
57  
58  
59  
60

- 1  
2  
3 (2) Zackrisson S, Janzon L, Manjer J, Andersson I. Improved survival rate for women with interval  
4 breast cancer - results from the breast cancer screening programme in Malmo, Sweden  
5 1976-1999. *Journal of Medical Screening* 2007; 14(3):138-143.  
6
- 7 (3) Brekelmans CT, Peeters PH, Deurenberg JJ, Collette HJ. Survival in interval breast cancer in  
8 the DOM screening programme. *Eur J Cancer* 1995; 31A(11):1830-1835.  
9
- 10 (4) Schroen AA, Wobbles T, van der Sluis RF. Interval carcinomas of the breast: a group with  
11 intermediate outcome. *J Surg Oncol* 1996; 63(3):141-144.  
12
- 13 (5) Bordas P, Jonsson H, Nystrom L, Lenner P. Survival from invasive breast cancer among  
14 interval cases in the mammography screening programmes of northern Sweden. *Breast*  
15 2007; 16(1):47-54.  
16
- 17 (6) Rayson D, Payne JI, Abdoell M, Barnes PJ, MacIntosh RF, Foley T et al. Comparison of clinical-  
18 pathologic characteristics and outcomes of true interval and screen-detected invasive breast  
19 cancer among participants of a Canadian breast screening program: a nested case-control  
20 study. *Clin Breast Cancer* 2011; 11(1):27-32.  
21
- 22 (7) Kirsh VA, Chiarelli AM, Edwards SA, O'Malley FP, Shumak RS, Yaffe MJ et al. Tumor  
23 characteristics associated with mammographic detection of breast cancer in the Ontario  
24 breast screening program. *J Natl Cancer Inst* 2011; 103(12):942-950.  
25
- 26 (8) Wegwarth O, Schwartz LM, Woloshin S, Gaissmaier W, Gigerenzer G. Do physicians  
27 understand cancer screening statistics? A national survey of primary care physicians in the  
28 United States. *Ann Intern Med* 2012; 156(5):340-349.  
29
- 30 (9) De Nooijer J, Lechner L, De Vries H. A qualitative study on detecting cancer symptoms and  
31 seeking medical help; an application of Andersen's model of total patient delay. *Patient*  
32 *Education and Counseling* 2001; 42(2):145-157.  
33
- 34 (10) Lerner BH. The breast cancer wars. Hope, fear, and the pursuit of a cure in twentieth-century  
35 America. Oxford: Oxford University Press; 2001.  
36
- 37 (11) Klawiter M. The biopolitics of breast cancer. Changing cultures of disease and activism.  
38 Minneapolis: University of Minnesota Press; 2008.  
39
- 40 (12) Aronowitz RA. Do not delay: Breast cancer and time, 1900-1970. *Milbank Quarterly* 2001;  
41 79(3):355-386.  
42
- 43 (13) Andersen RS, Paarup B, Vedsted P, Bro F, Soendergaard J. 'Containment' as an analytical  
44 framework for understanding patient delay: a qualitative study of cancer patients' symptom  
45 interpretation processes. *Soc Sci Med* 2010; 71(2):378-385.  
46
- 47 (14) Sun Y, Knobf T. Concept Analysis of Symptom Disclosure in the Context of Cancer. *Advances*  
48 *in Nursing Science* 2008; 31(4):332-341.  
49
- 50 (15) Andersen BL, Cacioppo JT. Delay in seeking a cancer diagnosis: delay stages and  
51 psychophysiological comparison processes. *Br J Soc Psychol* 1995; 34 ( Pt 1):33-52.  
52
- 53 (16) Ristvedt SL, Trinkaus KM. Psychological factors related to delay in consultation for cancer  
54 symptoms. *Psychooncology* 2005; 14(5):339-350.  
55  
56  
57  
58  
59  
60



- 1  
2  
3 (17) Facione NC, Facione PA. The cognitive structuring of patient delay in breast cancer. *Social*  
4 *Science & Medicine* 2006; 63(12):3137-3149.  
5  
6 (18) De Nooijer J, Lechner L, De Vries H. Social psychological correlates of paying attention to  
7 cancer symptoms and seeking medical help. *Soc Sci Med* 2003; 56(5):915-920.  
8  
9 (19) de GR, van AE, Tilanus-Linthorst MM, Bartels CC, Boer R, Draisma G et al. Breast cancer  
10 screening: evidence for false reassurance? *Int J Cancer* 2008; 123(3):680-686.  
11  
12 (20) Solbjør M. "You Have to Have Trust in Those Pictures." A Perspective on Women's  
13 Experiences of Mammography Screening. In: Brownlie J, Greene A, Howson A, editors.  
14 Researching Trust and Health. London: Routledge; 2008.  
15  
16 (21) Coffey A, Atkinson P. Making sense of qualitative data. Complementary research strategies.  
17 Thousand Oaks: Sage Publications; 1996.  
18  
19 (22) Kvale S, Brinkmann S. Interviews. An introduction to qualitative research interviewing. 2 ed.  
20 London: Sage; 2008.  
21  
22 (23) Andersen RS, Vedsted P, Olesen F, Bro F, Sondergaard J. Patient delay in cancer studies: a  
23 discussion of methods and measures. *BMC Health Serv Res* 2009; 9:189.  
24  
25 (24) Simon AE, Waller J, Robb K, Wardle J. Patient delay in presentation of possible cancer  
26 symptoms: the contribution of knowledge and attitudes in a population sample from the  
27 United kingdom. *Cancer Epidemiol Biomarkers Prev* 2010; 19(9):2272-2277.  
28  
29 (25) Rauscher GH, Ferrans CE, Kaiser K, Campbell RT, Calhoun EE, Warnecke RB. Misconceptions  
30 about breast lumps and delayed medical presentation in urban breast cancer patients.  
31 *Cancer Epidemiol Biomarkers Prev* 2010; 19(3):640-647.  
32  
33 (26) Macleod U, Mitchell ED, Burgess C, Macdonald S, Ramirez AJ. Risk factors for delayed  
34 presentation and referral of symptomatic cancer: evidence for common cancers. *Br J Cancer*  
35 2009; 101 Suppl 2:S92-S101.  
36  
37 (27) De Nooijer J, Lechner L, De Vries H. Help-seeking behaviour for cancer symptoms:  
38 Perceptions of patients and general practitioners. *Psycho-Oncology* 2001; 10(6):469-478.  
39  
40 (28) Carney PA, Steiner E, Goodrich ME, Dietrich AJ, Kasales CJ, Weiss JE et al. Discovery of breast  
41 cancers within 1 year of a normal screening mammogram: how are they found? *Ann Fam*  
42 *Med* 2006; 4(6):512-518.  
43  
44 (29) Haakinson DJ, Stucky CC, Dueck AC, Gray RJ, Wasif N, Apsey HA et al. A significant number of  
45 women present with palpable breast cancer even with a normal mammogram within 1 year.  
46 *Am J Surg* 2010; 200(6):712-717.  
47  
48 (30) Ma I, Dueck A, Gray R, Wasif N, Giurescu M, Lorans R et al. Clinical and self breast  
49 examination remain important in the era of modern screening. *Ann Surg Oncol* 2012;  
50 19(5):1484-1490.  
51  
52 (31) Villund O. Pensjoneringsalder - begreper, data, metoder. [73]. 2006. Statistics Norway. 25-8-  
53 2012. Online Source  
54  
55  
56  
57  
58  
59  
60

Table 1 Description of treatment for breast cancer, self-reported.

| Treatment  | Surgery    | Surgery + radiation | Surgery + chemotherapy | Surgery + radiation + chemotherapy |                   |
|------------|------------|---------------------|------------------------|------------------------------------|-------------------|
| Age        |            |                     |                        |                                    |                   |
| 50-54      | 0          | 0                   | 0                      | 3                                  |                   |
| 55-59      | 2          | 3                   | 0                      | 6                                  |                   |
| 60-64      | 0          | 4                   | 0                      | 4                                  |                   |
| 65-69      | 2          | 1                   | 1                      | 0                                  |                   |
| <b>Sum</b> | 4 (15,4 %) | 8 (30,8 %)          | 1 (3,8 %)              | 13 (50,0 %)                        | <b>Total N=26</b> |

Table 2 Description of women who participated in study: age and help-seeking behaviour

| Reaction time | Detected though other medical examinations | 1-2 days           | Within 2 weeks    | Less than 2 months | Approx 6 months  |                   |
|---------------|--------------------------------------------|--------------------|-------------------|--------------------|------------------|-------------------|
| Age           |                                            |                    |                   |                    |                  | Mean=59.4         |
| 50-54         | 0                                          | 2                  | 0                 | 1                  | 0                | 3 (11,5 %)        |
| 55-59         | 1                                          | 5                  | 3                 | 1                  | 1                | 11 (42,3 %)       |
| 60-64         | 0                                          | 3                  | 3                 | 2                  | 0                | 8 (30,8 %)        |
| 65-69         | 1                                          | 1                  | 0                 | 1                  | 1                | 4 (15,4 %)        |
| <b>Sum</b>    | <b>2 (7,7 %)</b>                           | <b>11 (42,3 %)</b> | <b>6 (23,0 %)</b> | <b>5 (19,2 %)</b>  | <b>2 (7,7 %)</b> | <b>Total N=26</b> |

1  
2  
3  
4  
5  
6  
7  
8  
9  
10  
11  
12  
13  
14  
15  
16  
17  
18  
19  
20  
21  
22  
23  
24  
25  
26  
27  
28  
29  
30  
31  
32  
33  
34  
35  
36  
37  
38  
39  
40  
41  
42  
43  
44  
45  
46  
47  
48  
49  
50  
51  
52  
53  
54  
55  
56  
57  
58  
59  
60

For peer review only
